1 **Selective Activation of TASK-3-containing K<sup>+</sup> Channels Reveals Their**  
2 **Therapeutic Potentials in Analgesia**

3 Ping Liao<sup>1\*</sup>, Yunguang Qiu<sup>3,8\*</sup>, Yiqing Mo<sup>2\*</sup>, Jie Fu<sup>2\*</sup>, Zhenpeng Song<sup>1\*</sup>, Lu Huang<sup>1\*</sup>,  
4 Suwen Bai<sup>4</sup>, Yang Wang<sup>4</sup>, Jia-Jie Zhu<sup>5</sup>, Fuyun Tian<sup>3</sup>, Zhuo Chen<sup>1</sup>, Nanfang Pan<sup>1</sup>, Er-Yi  
5 Sun<sup>1</sup>, Linghui Yang<sup>1</sup>, Xi Lan<sup>3</sup>, Yinbin Chen<sup>2</sup>, Dongping Huang<sup>2</sup>, Peihua Sun<sup>6</sup>, Lifan  
6 Zhao<sup>3</sup>, Dehua Yang<sup>3</sup>, Weiqiang Lu<sup>2</sup>, Tingting Yang<sup>7</sup>, Junjie Xiao<sup>7</sup>, Wei-Guang Li<sup>5</sup>,  
7 Zhaobing Gao<sup>3</sup>, Bing Shen<sup>4</sup>, Qiansen Zhang<sup>2</sup>, Jin Liu<sup>1</sup>, Hualiang Jiang<sup>3,8</sup>, Ruotian Jiang<sup>1†</sup>,  
8 Huaiyu Yang<sup>2†</sup>

9

10 <sup>1</sup>Laboratory of Anesthesia and Critical Care Medicine, Department of Anesthesiology,  
11 Translational Neuroscience Center, West China Hospital of Sichuan University, Chengdu  
12 610000, Sichuan, China.

13 <sup>2</sup>Shanghai Key Laboratory of Regulatory Biology, Institute of Biomedical Sciences,  
14 School of Life Sciences, East China Normal University, Shanghai 200241, China.

15 <sup>3</sup>State Key Laboratory of Drug Research and CAS Key Laboratory of Receptor Research,  
16 Shanghai Institute of Materia Medica, Chinese Academy of Sciences, Shanghai 201203,  
17 China.

18 <sup>4</sup>Department of Physiology, Anhui Medical University, Hefei 230032, Anhui, China.

19 <sup>5</sup>Collaborative Innovation Center for Brain Science, Department of Anatomy and  
20 Physiology, Shanghai Jiao Tong University School of Medicine, Shanghai 200025, China.

21 <sup>6</sup>Jiangsu Key Laboratory of Neuropsychiatric Diseases and College of Pharmaceutical  
22 Sciences, Soochow University, Suzhou, Jiangsu 215123, China

23 <sup>7</sup>Cardiac Regeneration and Ageing Lab, School of Life Science, Shanghai University,  
24 Shanghai 200444, China.

25 <sup>8</sup>University of Chinese Academy of Sciences, Beijing 100049, China

26

27 \* These authors contributed equally to this work.

28 †Corresponding authors. hyyang@bio.ecnu.edu.cn for H.Y.; ruotianjiang@scu.edu.cn for  
29 R.J..

30

## 31 **ABSTRACT**

32 **The paucity of selective agonists for TASK-3, a member of two-pore domain K<sup>+</sup>**  
33 **(K2P) channels, has contributed to our limited understanding of its biological**  
34 **functions. By targeting a novel druggable transmembrane cavity using a**  
35 **structure-based drug design approach, we discovered a biguanide compound,**  
36 **CHET3, as a highly selective allosteric activator for TASK-3-containing K2P**  
37 **channels, including TASK-3 homomer and TASK-3/TASK-1 heteromer. CHET3**  
38 **displayed unexpectedly potent analgesic effects *in vivo* in a variety of acute and**  
39 **chronic pain models in rodents that could be abolished by pharmacology or genetic**  
40 **ablation of TASK-3. We further found that TASK-3-containing channels**  
41 **anatomically define a unique subset population of small-sized, TRPM8, TRPV1 or**  
42 **tyrosine hydroxylase-positive nociceptive sensory neurons and functionally regulate**  
43 **their membrane excitability, supporting CHET3 analgesia in thermal hyperalgesia**

44 **and mechanical allodynia under chronic pain. Overall, our proof-of-concept study**  
45 **reveals TASK-3-containing K2P channels as a novel druggable target for treating**  
46 **pain.**

47

48 **One Sentence Summary:** Identification of a novel drug target and its new hit  
49 compounds for developing new-generation non-opioid analgesics.

50

## 51 **INTRODUCTION**

52 Currently available analgesics do not completely treat pain, and some of these analgesics,  
53 particularly opioids, provoke social problems (1). Thus, discovering new therapeutic  
54 targets for developing new-generation analgesics is an urgent need. In particular, targets  
55 that treat a variety of pain with similar potency but fewer side effects than  $\mu$ -opioid  
56 receptors are keenly awaited. In this regard, two-pore domain  $K^+$  (K2P) channels hold  
57 great promise (2) because they produce background leak  $K^+$  currents (3) and the  
58 activation of which in nociceptors theoretically inhibits pain signaling (4-6). The  
59 expression of TASK-3 (*Kcnk9*), a K2P channel, has been detected in the peripheral and  
60 central nervous system (7, 8), including in human dorsal root ganglia (9). Recent  
61 evidence has suggested that TASK-3 is involved in the perception of cold (10), and  
62 variations in the *Kcnk9* gene are associated with breast pain in breast cancer patients (11).  
63 However, its functional and anatomical involvement in chronic pain remains largely

64 unknown. More importantly, the paucity of selective agonists limits the drug target  
65 validation of TASK-3, leaving the notion that selective activation of TASK-3 alleviates  
66 pain remains to be tested experimentally. Here, we sought to discover selective activators  
67 for TASK-3 and to use the activators as tool compounds to reveal the translational  
68 potentials and the underlying mechanisms of TASK-3 in treating pain.

69

## 70 **RESULTS**

### 71 **Discovery of the selective activator CHET3 for TASK-3-containing channels**

72 We set out to discover selective activators for TASK-3 via structure-based virtual  
73 screening. Since no crystal structure of TASK-3 has yet to be determined, we sought to  
74 build a structural model using homology modeling. First, a crystal structure was chosen  
75 as the template. To this end, Fpocket 2.0 server (12) was applied to detect pockets in the  
76 reported crystal structures of K2P channels. In this computation, a druggability score  
77 greater than 0.5 (the threshold) means the pocket might be druggable. We found that the  
78 cavity under the intracellular side of the filter and the nearby crevice between TM2 and  
79 TM4 in four crystal structures (with PDB codes 4RUE, 3UKM, 4XDK and 4XDL)  
80 (13-15) had druggability scores greater than 0.5 (fig. S1). Thus, this cavity may be a drug  
81 binding pocket. Among the four crystal structures, the structure of TREK-2 channel (PDB  
82 code 4XDL) is a suitable template for building the structural model of TASK-3 because  
83 this structure has good sequence identity (31%) and expectation value (3E-32) in the

84 sequence alignment generated using the BLAST program (blastp algorithm) and the  
85 Clustal Omega server (16, 17). Moreover, this TREK-2 structure stood out from the  
86 template searching results (with the best QSQE value: 0.66) in the SWISS-MODEL  
87 server (18, 19). Thus, the structural model of TASK-3 was built based on this crystal  
88 structure with Modeller (20). Then, based on this model, we performed virtual screening  
89 targeting the pocket (Fig. 1, A and B) with SPECS and ChemBridge databases. A few hits  
90 were selected for the whole-cell patch-clamp electrophysiological tests in HEK-293T  
91 cells overexpressing recombinant human TASK-3, which led to the discovery of a  
92 biguanide compound CHET3, a novel TASK-3 activator (half-maximum effective  
93 concentration ( $EC_{50}$ )  $1.4 \pm 0.2 \mu\text{M}$ , Fig. 1, C to F). CHET3 maximally enhanced  
94 TASK-3-mediated  $K^+$  currents by  $\sim 4$ -fold, which could be reversed by washout (Fig. 1D)  
95 or with pharmacological blockade by PK-THPP ( $86 \pm 3\%$  inhibition at  $0.5 \mu\text{M}$ ,  $n = 6$   
96 cells, representative traces shown in Fig. 1E). PK-THPP is a selective inhibitor for  
97 TASK-3 against other K2P and other  $K^+$  channels including potassium voltage-gated  
98 channel subfamily A member 5 (Kv1.5), human ether-à-go-go-related gene (hERG) and  
99 G protein-activated inward rectifier potassium channel 4 ( $K_{ATP}$ ) (21), and we further  
100 showed  $0.5 \mu\text{M}$  PK-THPP was insensitive to voltage-gated  $K^+$  channel subfamily B  
101 member 1 (Kv2.1) and large conductance  $Ca^{2+}$ -activated  $K^+$  channel (BK) channels (fig.  
102 S2). In single-channel recordings by inside-out patches, CHET3 enhanced the channel  
103 openings mediated by TASK-3 (Fig. 1, G to J), further supporting that CHET3 directly

104 activated TASK-3. Increases in open probability were observed in both the inward and  
105 outward directions in response to 3  $\mu$ M CHET3 (Fig. 1J).

106 In addition to forming homomer channels, the TASK-3 subunit can efficiently form  
107 heteromer channels with the TASK-1 subunit (22). Electrophysiological assays showed  
108 that CHET3 could activate TASK-3/TASK-1 (23, 24) with an EC<sub>50</sub> value of  $2.5 \pm 0.2$   $\mu$ M  
109 with a reduced maximal efficacy of  $\sim 2.4$ -fold (Fig. 1F), and this activation could also be  
110 blocked by PK-THPP ( $90 \pm 2\%$  inhibition at 0.5  $\mu$ M, n = 5 cells, representative traces  
111 shown in fig. S3A). However, CHET3 did not activate TASK-1 channels up to 10  $\mu$ M  
112 (Fig. 1F and fig. S3B). Thus, CHET3 is an activator specific for the TASK-3 homomer  
113 and TASK-3/TASK-1 heteromer, two TASK-3-containing channels, with high selectivity  
114 against the structurally most related K<sup>+</sup> channel TASK-1. In the subsequent sections, we  
115 use TASK-3-containing channels to represent TASK-3 homomer and TASK-3/TASK-1  
116 heteromer.

117 Next, we further examined the selectivity of CHET3. Electrophysiological assays of  
118 several other K2P channels, including TREK-1, TREK-2, TRAAK, TRESK and THIK-1,  
119 further supported that CHET3 has high subtype selectivity among the K2P family (Fig.  
120 1K and fig. S3B). Furthermore, we found that 10  $\mu$ M CHET3 has high selectivity against  
121 hERG, Kv2.1 and BK channels, which are three K<sup>+</sup> channels sharing similar filter  
122 structure and dynamics with K2P (25), as well as transient receptor potential cation  
123 channel subfamily M member 8 (TRPM8) and transient receptor potential cation channel

124 subfamily V member 1 (TRPV1) (Fig. 1L, fig. S3, C to G).

125 We also excluded agonizing and antagonizing functions of CHET3 on pain-related G  
126 protein-coupled receptors (GPCRs) by testing the cellular function of  $\mu$ -opioid receptor  
127 ( $\mu$ OR), 5-hydroxytryptamine receptor 1B (5-HT<sub>1B</sub>R) and cannabinoid receptor type 1  
128 (CB<sub>1</sub>R) upon treatment with 10  $\mu$ M CHET3 (fig. S4). Collectively, these results indicate  
129 that CHET3 is a selective activator of TASK-3-containing channels.

### 130 **Activation mechanism of CHET3**

131 Binding models derived from docking simulation were optimized by molecular  
132 dynamics (MD) simulations (fig. S5), which revealed the predominant binding mode of  
133 CHET3 within the pocket (Fig. 2, A and B). We next examined the ligand-channel  
134 interactions in this binding mode using mutagenesis experiments and RosettaLigand (26,  
135 27). Residues T93 and T199 indirectly interacted with CHET3 by water bridges (Fig. 2, A  
136 and B). The two residues belong to the filter region, and T93A and T199A mutations led  
137 to nonfunctional channels (fig. S6, A and B). F125 may form a  $\pi$ - $\pi$  interaction with  
138 CHET3, and other surrounding residues, including I118, F125, T198, L232, I235, F238  
139 and L239, likely contribute hydrophobic interactions with the ligand. RosettaLigand  
140 computations based on this MD mode predicted that the I118A, F125A, L232A, I235A,  
141 F238A and L239A mutants decrease CHET3 binding, while the T198A mutant should not  
142 (Fig. 2C). Indeed, a saturating concentration of CHET3 (10  $\mu$ M) showed no activation on  
143 F125A, I235A, and F238A mutants and reduced activation on L239A mutant, whereas

144 CHET3 activated T198A similarly to the wild-type (WT) (Fig. 2D). Mutant L232A is  
145 nonfunctional (fig. S6C). Although CHET3 did not show reduced activation on I118A  
146 (Fig. 2D), the experimental results are generally consistent with the computational  
147 predictions. To gain further insight into the action mechanism of CHET3, MD  
148 simulations were carried out on *apo* TASK-3 for comparison with CHET3-bound  
149 TASK-3 (Fig. 2, E and F). In two out of three independent simulations for the *apo* system,  
150 the channel selectivity filter tended to stay in a nonconductive-like conformational state  
151 (Fig. 2, E and F). In contrast, in all three simulations for the CHET3-bound system, the  
152 channel filter adopted a conductive-like state (Fig. 2, E and F). Furthermore, our  
153 simulations supported the previous report by González *et al.* that the H98 residue plays a  
154 role in modulating the extracellular ion pathway in TASK-3 (28). In the simulations of the  
155 CHET3-bound TASK-3, H98 adopted a conformation opening the extracellular ion  
156 pathway (Fig. 2E and fig. S7A). In contrast, in ligand-free mode, H98 has a high  
157 probability of adopting a conformation closing this pathway (Fig. 2E and fig. S7B).

### 158 **CHET3-induced analgesia in rodents**

159 Next, we systematically evaluated CHET3 in analgesia. The anti-nociceptive effect of  
160 CHET3 was first assessed by the tail immersion test at 52 °C. CHET3 displayed  
161 dose-dependent analgesia with a fast onset (30 min) after intraperitoneal (i.p.) injection,  
162 with a maximal effect at a dose of 10 mg/kg (Fig. 3A). Hereafter, 10 mg/kg i.p. injection  
163 was used for most of the following animal studies. Interestingly, CHET3 was only



164 effective in response to a noxious cold stimulus (5 °C) or a noxious heat stimuli (46 °C  
165 and 52 °C) but not to physiological stimuli (20 °C and 40 °C) (Fig. 3A). Importantly, the  
166 CHET3 analgesia was fully blocked by the co-administration of PK-THPP, and PK-THPP  
167 alone also produced a nociceptive effect in the tail immersion test at 46 °C (Fig. 3A).  
168 Next, both the early and late phases (29) of acute inflammatory pain induced by formalin  
169 were attenuated by CHET3 (Fig. 3B), suggesting at least a peripheral effect of CHET3.  
170 The paw pressure test revealed that CHET3 reduced mechanical pain in mice, and the  
171 effect was fully blocked by PK-THPP (Fig. 3C). Next, we evaluated the analgesic effects  
172 of CHET3 on chronic pathological pain. In the spared nerve injury (SNI)-induced  
173 neuropathic pain mouse model, CHET3 significantly reduced the frequency of hind paw  
174 lifting (Fig. 3D), an indicator of spontaneous/ongoing pain behavior in the SNI model  
175 (30). In the cold plantar test, CHET3 attenuated the cold hyperalgesia in SNI in the  
176 development (SNI 7 d) and maintenance (SNI 14 d and 21 d) stages of chronic pain,  
177 which could be reversed by PK-THPP. PK-THPP alone, however, had no effect in the  
178 cold plantar test in SNI mice (Fig. 3E). CHET3 was more effective in relieving cold  
179 hyperalgesia than pregabalin, a first-line agent for the treatment of neuropathic pain (Fig.  
180 3F). In SNI mice, CHET3 had little effect on alleviating mechanical allodynia in the von  
181 Frey test. However, in SNI rats, 10 mg/kg CHET3 attenuated mechanical allodynia  
182 throughout the different stages of chronic pain in the von Frey test, which could be  
183 reversed by PK-THPP (Fig. 3G). PK-THPP alone had no effect on pain in the von Frey

184 test in SNI rats (Fig. 3G). The analgesic effect of CHET3 at a dose of 20 mg/kg exhibited  
185 a faster onset (30 min post injection) with similar efficacy to 10 mg/kg CHET3 (fig. S8)  
186 in the von Frey test in SNI rats. In chronic inflammatory pain induced by the Complete  
187 Freund's Adjuvant (CFA), CHET3 reduced heat hyperalgesia in the Hargreaves test,  
188 which was blocked by PK-THPP (Fig. 3H). In addition, PK-THPP injection alone  
189 aggravated heat hyperalgesia (Fig. 3H).

190 Chronic pain may induce anxiety (31, 32). Compared with Sham mice, SNI mice  
191 spent less time in open arms in the elevated plus maze test and spent less time in the light  
192 box in the light/dark box test, suggesting anxiety-like behaviors in the SNI mice. The  
193 administration of CHET3 30 min before the test significantly alleviated anxiety-like  
194 behaviors in both tests (Fig. 3, I and J). Together, our data suggest that CHET3 potently  
195 and efficaciously attenuated acute and chronic pain and pain-associated anxiety in rodents,  
196 and the analgesic effects of CHET3 could be pharmacologically blocked by the TASK-3  
197 blocker PK-THPP. Importantly, CHET3 had no effects in grip strength, rotarod and open  
198 field tests (fig. S9, A to C), suggesting that CHET3 had no effect on the locomotion  
199 activities in mice. Since TASK-3 was found to be expressed in mouse carotid body type-1  
200 cells (33), we also evaluated the possible side effects of CHET3 on cardiovascular  
201 function in mice or rats. We monitored blood pressure and heart functions using  
202 echocardiography, and we did not observe any significant change in blood pressure (fig.  
203 S9, D to F) or heart functions including Ejection Fraction (EF) and Fractional Shortening

204 (FS) (table S1) in a post-injection time window between 45 min–90 min, during which  
205 CHET3-induced analgesia peaked in most cases. We also monitored the change in body  
206 temperature following CHET3 systemic administration, and no significant hyperthermia  
207 or hypothermia was observed (fig. S9G).

### 208 **Further on-target validation using chemical and genetic approaches**

209 Was CHET3 truly targeting TASK-3 containing K<sup>+</sup> channels as an analgesic? We next  
210 performed additional target validation experiments using chemical and genetic  
211 approaches. Medicinal chemistry yielded CHET3-1 and CHET3-2 (Fig. 4A), two  
212 derivatives of CHET3. In the CHET3-TASK-3 binding model (Fig. 2, A and B), the  
213 dioxane ring may form a  $\pi$ - $\pi$  interaction with the F125 residue. CHET3-1, in which the  
214 dioxane ring is replaced with an aromatic ring, should maintain the  $\pi$ - $\pi$  interaction.  
215 CHET3-2 should lose the  $\pi$ - $\pi$  interaction since the dioxane ring is replaced by a steric  
216 bulk *tert*-butyl group. Binding energy computations based on the binding model  
217 suggested that the binding affinity of CHET3-1 to TASK-3 was similar to that of CHET3,  
218 while that of CHET3-2 decreased (fig. S10). In accordance, CHET3-1 activated TASK-3  
219 with an EC<sub>50</sub> value of  $0.5 \pm 0.1$   $\mu$ M, while CHET3-2 was inactive (Fig. 4B), further  
220 supporting the putative binding model. We reasoned that CHET3-1 should be bioactive in  
221 analgesia, whereas CHET3-2 should not, if CHET3 truly targets TASK-3-containing  
222 channels to act as an analgesic. Indeed, CHET3-1 attenuated cold hyperalgesia in SNI  
223 mice (Fig. 4C), mechanical allodynia in SNI rats (Fig. 4D), and heat hyperalgesia in CFA

224 mice (Fig. 4E), and all of these effects could be reversed by PK-THPP (fig. S11). In  
225 contrast, CHET3-2 was completely inactive in all the experiments above (Fig. 4, C to E).

226 We also generated *Kcnk9* gene knockout (TASK-3 KO) mice (fig. S12). Knocking out  
227 *Kcnk9* should abolish the function of TASK-3 homomer and TASK-3/TASK-1 heteromer  
228 *in vivo*. In TASK-3 KO mice and WT control mice, we measured the basal sensitivity to  
229 nociception, thermal hyperalgesia and mechanical allodynia, and we also evaluated the  
230 analgesic effect of CHET3 in these mice. Tail immersion (Fig. 5, A and B), paw pressure  
231 tests (Fig. 5C) and von Frey tests in naïve animals (Pre SNI, Fig. 5D) did not reveal any  
232 significant difference in baseline nociceptive sensitivity between TASK-3 KO and WT;  
233 however, cold plantar (Pre SNI, Fig. 5F) and Hargreaves tests (Pre CFA, Fig. 5G)  
234 revealed increased nociceptive cold and heat sensitivity in TASK-3 KO mice.  
235 Furthermore, in the chronic pain models, von Frey, cold plantar and Hargreaves tests  
236 revealed that TASK-3 KO mice exhibited aggravated mechanical allodynia (Fig 5D),  
237 spontaneous neuropathic pain behavior (Fig. 5E), and thermal hyperalgesia (Fig. 5, F and  
238 G). As expected, CHET3 was completely inactive in TASK-3 KO mice in all the tests  
239 described above (Fig. 5, A to G). Thus, using tool compounds (Fig. 4) and mouse genetics  
240 (Fig. 5), we provide strong evidence showing that CHET3 targets TASK-3-containing  
241 channels, thus acting as an analgesic, and the loss of TASK-3 contributed to the  
242 generation/maintenance of both acute and chronic pain.

243 **Distribution of TASK-3-containing channels in sensory neurons**

244 Our pharmacokinetic profile of CHET3 (tables S2 and S3) showed a negligible brain  
245 concentration of CHET3 and a high concentration of CHET3 in the plasma in both the  
246 naïve and SNI 7-d mice, suggesting that CHET3 mainly acted peripherally. The  
247 peripheral effect of CHET3 is also supported by the fact that CHET3 attenuated the early  
248 phase of formalin-induced pain (Fig. 3B). These findings, along with the previous finding  
249 that TASK-3 in dorsal root ganglion (DRG) neurons mediates cold perception (10),  
250 strongly suggest that peripheral TASK-3-containing channels contribute largely, if not  
251 entirely, to the analgesic effects of CHET3. Therefore, we evaluated the TASK-3  
252 functions/distributions in the peripheral nervous system, particularly in DRG.

253 We used fluorescence in situ hybridization (ISH) (RNAscope technique) to map the  
254 mRNA expression of TASK-3 in DRG and trigeminal ganglia (TG). The specificity of the  
255 fluorescent signals was validated by a positive control probe and a negative control probe  
256 (see the Methods). *Kcnk9* was identified in a subset of neurons (~7% of total neurons) in  
257 DRG, predominantly in small-sized neurons (diameter  $\leq 20 \mu\text{m}$ ) (Fig. 6, A and C),  
258 indicative of its specific expression in nociceptors. Interestingly, a much higher  
259 expression level of *Kcnk9* (~14% of total neurons) was found in TG (Fig. 6, A and B). In  
260 DRG, approximately 95% of *Kcnk9*<sup>+</sup> neurons express the TASK-1 subunit, suggesting  
261 possible formation of the TASK-3/TASK-1 heteromer in DRG, and approximately 50%  
262 of *Kcnk9*<sup>+</sup> neurons express TRPV1, a well-known noxious heat sensor predominantly  
263 expressed in peptidergic nociceptive sensory neurons (34). More than 95% of *Kcnk9*<sup>+</sup>

264 neurons express TRPM8, and very little *Kcnk9*<sup>+</sup> neurons express TRPA1, two well-known  
265 noxious cold sensors (34). Furthermore, approximately 50% of *Kcnk9*<sup>+</sup> neurons express  
266 tyrosine hydroxylase (TH), a marker for c-low threshold mechanoreceptors (c-LTMRs)  
267 predominantly found in nonpeptidergic nociceptors (35), whereas *Kcnk9* rarely  
268 colocalizes with *P2rx3* (P2X3), which labels mainly TH<sup>-</sup> negative, IB4<sup>+</sup> nonpeptidergic  
269 nociceptors (36), nor does *Kcnk9* colocalize with *Ntrk2* (TrkB), a marker for A $\delta$ -LTMRs  
270 (35). Thus, TASK-3 marks a unique subpopulation of both peptidergic and  
271 nonpeptidergic nociceptive sensory neurons enriched in thermal sensors (TRPV1,  
272 TRPM8) or mechanoreceptors (TH<sup>+</sup> c-LTMRs) (Fig. 6, D to F), in line with its functional  
273 involvement in thermal and mechanical sensation *in vivo*. In agreement with a previous  
274 study (37), we found that *Kcnk9* expression was downregulated in SNI mice and CFA  
275 mice (fig. S13), further suggesting that the downregulation of TASK-3-containing  
276 channels contributes to the generation/maintenance of chronic pain.

### 277 **Functional roles of TASK-3-containing channels in nociceptive neurons**

278 The functional roles of TASK-3-containing channels were examined by whole-cell  
279 patch-clamp recordings in dissociated DRG neurons. Recordings were focused on small  
280 DRG neurons (diameter of ~20  $\mu$ m, cell capacitance of ~30 pF) based on the ISH data. To  
281 isolate K<sup>+</sup> currents, voltage ramps from -120 mV to -30 mV were applied. In total, 89  
282 cells were recorded, and 16 cells responded to CHET3 (20.3  $\pm$  6.3%, 11 mice). In the  
283 CHET3-sensitive cells, CHET3 enhanced the whole-cell current density by

284 approximately 18%, which could be further inhibited by PK-THPP by approximately 38%  
285 at -30 mV (Fig. 7A). We subtracted the CHET3-sensitive current, and we found this  
286 current was strongly outwardly rectifying and was tiny between -120 mV and -60 mV,  
287 leaving the reversal potential of the CHET3-sensitive current difficult to resolve (Fig. 7B).  
288 We further sought to isolate current carried by TASK-3-containing channels by  
289 subtracting PK-THPP-sensitive current. We consistently found a similar profile for  
290 PK-THPP-sensitive current (fig. S14A), further suggesting the low basal conductance at  
291 hyperpolarized membrane potentials, while strong outwardly rectifying represents an  
292 intrinsic property of K<sup>+</sup> currents mediated by TASK-3-containing channels in DRG under  
293 our experimental conditions. To increase the drive force of the K<sup>+</sup> currents in the  
294 hyperpolarized potentials, we increased the extracellular K<sup>+</sup> concentration to 143 mM.  
295 Under this condition, the CHET3-sensitive current was reversed at approximately 6.7 mV,  
296 which was close to the theoretical value of 1.5 mV for K<sup>+</sup> conductance (Fig. 7B).

297 The tiny CHET-3- or PK-THPP-mediated currents at approximately -60 mV suggest  
298 that the basal activity of TASK-3-containing channels around the resting membrane  
299 potential (RMP) range was low and, thus, that CHET3 or PK-THPP is unlikely to be able  
300 to regulate the RMP. To systematically evaluate the regulatory role of CHET3 on the  
301 excitability of nociceptive neurons, we first applied a cocktail solution containing  
302 menthol and capsaicin, two agonists for TRPM8 and TRPV1 (38, 39), respectively, to  
303 better identify the nociceptive neurons that likely express TASK-3-containing channels.

304 Only neurons responding to the cocktail (fig. S14B) were studied in the subsequent  
305 experiments. Consistent with the low activity of TASK-3-containing channels at  
306 approximately -60 mV, the application of CHET3 or PK-THPP or vehicle (Control) did  
307 not hyperpolarize the RMP; rather, they all slightly depolarized the membrane by ~2 mV  
308 with no significant difference among the three groups, suggesting that CHET3 or  
309 PK-THPP had no specific roles in altering RMP (Fig. 7C). Next, we explored how  
310 CHET3 regulates action potentials. In 12 out of 27 neurons, the application of CHET3  
311 markedly increased the rheobase required to elicit the action potentials (APs) by ~70%  
312 and decreased the frequency of APs evoked by suprathreshold current injections by ~65%  
313 (Fig. 7, D and E). In the other 15 cells, CHET3 had no effect on the rheobase and slightly  
314 increased the frequency of APs evoked by suprathreshold current injections by 10% (fig.  
315 S14, C and D). In 7 of these 12 CHET3-sensitive cells, we were able to further apply  
316 PK-THPP, which reversed the effects of CHET3 (fig. S14, E and F). Furthermore, in  
317 another independent set of experiments, we coapplied CHET3 and PK-THPP in naïve  
318 cells. In 11 out of 27 cells, the coapplication of CHET3 and PK-THPP markedly  
319 decreased the rheobase by ~40% and increased the frequency of APs evoked by  
320 suprathreshold current injections by ~50% (Fig. 7, F and G); in the other 16 cells,  
321 coapplication of CHET3 and PK-THPP slightly increased the rheobase by ~20% but had  
322 no effect on the AP frequency evoked by suprathreshold current injections (fig. S14, G  
323 and H). Collectively, our electrophysiological data suggest the functional presence of K<sup>+</sup>



324 currents mediated by TASK-3-containing channels, the enhancement of which reduces  
325 the excitability of nociceptive neurons without affecting the RMP.

326 Finally, Ca<sup>2+</sup> imaging experiments were performed in acutely dissociated DRG neurons  
327 to measure how the activation of TASK-3-containing channels contributes to the thermal  
328 sensitivity of DRG neurons. Thermal stimulations elicited Ca<sup>2+</sup> signals in a portion of  
329 small-sized DRG neurons (Fig. 7H, cells with an F<sub>340</sub>/F<sub>380</sub> ratio  $\geq 0.2$  were considered  
330 responding cells shown in black, and those with an F<sub>340</sub>/F<sub>380</sub> ratio  $< 0.2$  were considered  
331 nonresponding cells shown in gray). We confirmed that these Ca<sup>2+</sup> signals were  
332 temperature-dependent and were mediated by TRP channels because the heat-induced  
333 responses could be blocked by 5  $\mu$ M AMG9810 (TRPV1 antagonist) (40) (fig. S15, A and  
334 B), and the cool-induced responses could be blocked by 10  $\mu$ M BCTC (TRPM8  
335 antagonist) (38) and 20  $\mu$ M HC030031 (TRPA1 blocker) (41) (fig. S15, A and B). Bath  
336 application of 10  $\mu$ M CHET3 significantly and markedly inhibited the Ca<sup>2+</sup> signals  
337 evoked by cool- or heat- stimulation in small-sized DRG neurons (Fig. 7, H and I),  
338 suggesting that the activation of TASK-3-containing channels was able to lower the  
339 excitability of the nociceptive neurons in response to external thermal stimulations.

340

## 341 **DISCUSSION**

342 The current study has three major findings: First, we discovered selective agonists  
343 for TASK-3-containing channels by targeting a transmembrane cavity under the

344 selectivity filter using structure-based approaches. Second, *in vivo* activation of  
345 peripheral TASK-3-containing channels displayed potent analgesia, suggesting a  
346 TASK-3-based therapeutic strategy for treating chronic inflammatory and neuropathic  
347 pain. Third, our anatomical and functional data highlight the roles of peripheral  
348 TASK-3-containing channels in controlling the excitability of nociceptive neurons.

349       Very recently, Schewe *et al.* reported a class of negatively charged activators (NCAs)  
350 that could activate K2P channel, hERG channel and BK channel and revealed that the site  
351 below the selectivity filter is the binding site of the NCAs (25). In the present work, our  
352 virtual screening obtained CHET3, a non-charged compound that acts on this site, further  
353 supporting the finding that the site below the selectivity filter is a ligand binding site. It is  
354 noteworthy that NCAs are nonselective activators for a variety of K<sup>+</sup> channels, while  
355 CHET3 is highly selective for TASK-3-containing channels, suggesting the versatility of  
356 this binding site. Additionally, NCAs and CHET3 may share some common activation  
357 mechanisms on K2P channels, as they both influence the conformation of the selectivity  
358 filter. Notably, the activation mechanism we describe in this study does not fully explain  
359 the selectivity of CHET3. In particular, TASK-1 and TASK-3 are the closest relatives to  
360 each other, and the residues below the selectivity filter as well as H98 are conserved.  
361 Further studies to elucidate the differential responses of TASK-1 and TASK-3 to CHET3  
362 may be helpful for understanding the selective modulation principle in K2P.

363       In most cases, the initial proof-of-concept identification of a protein as a potential

364 target is dependent on genetic methods. However, genetic deletion may induce  
365 modifications to other genes. This off-target genetic side effect discredits target validation  
366 work. This is particularly the case in the field of pain medicine: genetically mutated mice,  
367 e.g.,  $Na_v1.7$ -null mice and humans exhibited remarkable insensitivity to pain, whereas  
368 potent selective antagonists have weak analgesic activity (42, 43). Another example  
369 related to the K2P field is that migraine-associated TRESK mutations lead to the  
370 inhibition of TREK-1 and TREK-2 through frame shift mutation-induced alternative  
371 translation initiation (fsATI) to increase sensory neuron excitability and are linked to  
372 migraine (44). Using chemical probes to validate targets pave another way for later  
373 translational research. Regarding *in vivo* applications of chemical probes in target  
374 identification and validation, a major issue is whether the observed phenotypes are indeed  
375 relevant to the on-target of the probes. In this study, we provide three independent lines of  
376 evidence showing that CHET3 targets TASK-3-containing channels to act as an analgesic.  
377 First, the TASK-3 inhibitor PK-THPP could block CHET3-induced analgesia. Second,  
378 two structurally similar analogs were discovered and used in the *in vivo* tests. CHET3-1, a  
379 TASK-3 activator structurally similar to CHET3, is bioactive in analgesia, and could also  
380 be blocked by PK-THPP. CHET3-2, another analog that is highly structurally similar to  
381 CHET3, did not activate TASK-3 and was completely ineffective in all the analgesia tests.  
382 Finally, CHET3 had no analgesic effect in TASK-3 KO mice in all the tests. Collectively,  
383 our data suggest that the on-target activity of CHET3 is linked to the analgesic

384 phenotypes.

385       Although CHET3 has a higher activation efficacy on TASK-3 over TASK-3/TASK-1,  
386 we suggest that both TASK-3 homomer and TASK-3/TASK-1 heteromer channels likely  
387 contribute to CHET3-induced analgesia for the following reasons: 1) *Kcnk9* is highly  
388 colocalized with *Kcnk3* in DRG; 2) TASK-3/TASK-1 heteromer has been found  
389 assembled efficiently and functionally in cerebellar granule cells (45), motoneurons (46)  
390 and carotid body glomus cells (47).

391       We found that CHET3 decreased the excitability without changing the RMP of  
392 nociceptive neurons. The lack of change in RMP could be explained by the fact that  
393 CHET3- or PK-THPP-mediated currents are negligible at approximately  $-60$  mV. One  
394 may argue that there may be strong depolarizing “off-target” activity of CHET3 through  
395 another unknown channel/receptor, thereby masking the hyperpolarizing effect mediated  
396 by CHET3 on TASK-3-containing channels. However, if this were the case, one would at  
397 least expect PK-THPP to depolarize the RMP since PK-THPP, a molecule that is  
398 structurally distinct from CHET3, is unlikely to produce hyperpolarizing “off-target”  
399 activity through the same unknown channel/receptor.

400       CHET3 acted mainly on peripheral TASK-3-containing channels. Peripheral targets  
401 are much less likely to produce central side effects, including dependence/addiction.  
402 Although the utility of CHET3 and its derivatives as preclinical candidate compounds  
403 requires further assessment with systematic nonclinical safety tests performed in GLP

404 (Good Laboratory Practice) in rodents and other animals, it seems that the activation of  
405 peripheral TASK-3-containing channels does not produce obvious severe acute side  
406 effects on the cardiovascular system, where TASK-3-containing channels are also  
407 expressed. Interestingly, we found that TASK-3 was more highly expressed in TG than in  
408 DRG. Further studies are needed to evaluate the translational potentials of TASK-3  
409 activation (TASK-3/TASK-1) in TG to treat chronic pain related to trigeminal neuralgia  
410 and migraine. Finally, although TASK-3 is expressed in human DRG (9) and variation in  
411 *KCNK9* is involved in breast pain in breast cancer patients (11), direct evidence for the  
412 functional involvement of TASK-3 in pain signaling in humans is lacking. Future  
413 functional studies on human tissues or studies with genetic screening of TASK-3-related  
414 mutations in humans would greatly aid in assessing the translational potential of TASK-3  
415 for treating pain in humans.

416

## 417 **MATERIALS AND METHODS**

### 418 **Study design**

419 Structure-based drug design methods were used to perform initial virtual screening, and  
420 patch-clamp electrophysiology was mainly used to study the activity/mechanism of  
421 candidate compounds on TASK-3-containing channels. The analgesic effects of TASK-3  
422 activators were then studied in acute and chronic pain models in mice and rats.  
423 Pharmacokinetic analysis was performed to assess how CHET3 was distributed. KO mice

424 were used to confirm the on-target activity of CHET3. Finally, *in situ* hybridization with  
425 the RNAscope technique was used to map the distribution of TASK-3 in DRG and TG.  
426 The functional roles of TASK-3 were assessed by measuring how CHET3 and PK-THPP  
427 modulate K<sup>+</sup> currents, action potential firings and sensitivity to thermal stimulation in  
428 nociceptive neurons.

429 Sample size and replicates: For single-cell based experiments, at least 5 cells per  
430 condition were tested. For *in vivo* studies in animals, 6-10 animals per condition were  
431 used. No power analysis was performed to determine the sample size.

#### 432 **Homology modeling for the TASK-3 structure**

433 A sequence alignment was generated by using the Clustal Omega server (16). Notably,  
434 the two pore domains and selectivity filter sequence motifs were highly conserved among  
435 the K2P channels, which were largely used to guide the alignment. Conserved residues  
436 E30 and W78 in TASK-3 helped to locate the position of the non-conserved cap domain.

#### 437 **Virtual screening**

438 Docking was performed by using Schrödinger Glide software (New York, NY, USA).  
439 Compounds were screened using the high-throughput virtual screening (HVS) module  
440 followed by the standard docking module SP in Glide. The Glide G-score was used to  
441 rank the results list. To allow for diversity of molecular structures, binding modes and  
442 drug-like properties, twelve hits were selected for the bioassay.

#### 443 **Chemicals**

444 PK-THPP was purchased from Axon Medchem. CHET3 purchased from commercial  
445 sources was used in the initial electrophysiological screening. Then, CHET3 was  
446 synthesized in the lab for the following studies in this paper. The synthesis routes and  
447 characterization of CHET3 and its derivatives CHET3-1 and CHET3-2 are outlined in the  
448 Supplementary Materials.

449 For electrophysiology, stock solutions of CHET3 and its derivatives (50 mM) were  
450 prepared in dimethyl sulfoxide (DMSO) and diluted in the extracellular solution before  
451 use.

452 For animal studies, CHET3 and PK-THPP were both dissolved in 10% DMSO, 5%  
453 Tween 80 and 85% saline; CHET3-1 was dissolved in 10% DMSO, 5% ethoxylated  
454 castor oil, 35% poly (ethylene glycol) and 50% corn oil; and CHET3-2 was dissolved in  
455 14% DMSO, 5% Tween 80 and 81% saline. The solvents were used as vehicle controls.

#### 456 **Detailed modeling of the CHET3-TASK-3 binding poses**

457 Initially, the configuration of CHET3 was determined by the Ligprep module in  
458 Schrödinger Maestro and Gaussain09 (Gaussian, Inc). Detailed descriptions are displayed  
459 in the Supplementary Materials. The configuration of the tautomer with the lowest energy  
460 was adopted to generate multiple ring conformations. CHET3 conformations were  
461 docked to the TASK-3 channel model by standard Glide as described for the virtual  
462 screening. Two binding modes (G-score values at -8.3 and -7.9, separately) were obtained  
463 from docking. In the best pose (1<sup>st</sup> model in fig. S5A), the guanidyl group in CHET3

464 establishes a hydrogen bond with the backbone NH of residue L232 in TM2, while the  
465 guanidyl group in the additional mode of binding (2<sup>nd</sup> model in fig. S5B) faces towards  
466 the selectivity filter and interacts with hydroxyl group of T199. To identify the accurate  
467 binding mode of CHET3, two docking models were further studied using molecular  
468 dynamics (MD) simulations (see below).

#### 469 **MD simulations**

470 The TASK-3 model obtained from homology modeling and two binding models of  
471 CHET3-bound TASK-3 were used to build the models of *apo* TASK-3 and  
472 CHET3-bound TASK-3, respectively. Models were inserted in a POPC  
473 (1-palmitoyl-2-oleoyl-sn-glycero-3-phosphocholine) lipid bilayer to establish the  
474 CHET3-bound system and the *apo* system, respectively. MD simulations were carried out  
475 by using GROMACS 5.1.4 (48) with CHARMM36 parameters (49).

#### 476 **Comparison of the binding of CHET3, CHET3-1 and CHET3-2**

477 The RosettaLigand application (26, 27) was applied to dock CHET3, CHET3-1 and  
478 CHET3-2. The best binding mode obtained from MD simulations was adopted as the  
479 initial docking model. For each docking trial, the top 1000 models were sorted by total  
480 score, and the binding energy between three compounds and the channel was calculated.  
481 Additionally, *in silico* alanine scans were conducted by individually changing the residue  
482 to alanine without otherwise changing the conformation of the protein or ligands in  
483 Rosetta. To explore the distribution of binding interactions between compounds and



484 proteins, the average energies of the top 10 models with the lowest binding energies  
485 (interface score) were calculated. To compare the binding of CHET3, CHET3-1 and  
486 CHET3-2, the top 50 models of each compound with the lowest binding energies were  
487 used to calculate the total score and interface score.

#### 488 **Electrophysiology**

489 Electrophysiology tests of hTASK-3, hTASK-1, hTREK-1, mTREK-2, hTRAAK,  
490 hTHIK-1, hTRESK, hTASK-3/hTASK-1, hTRPM8 and hTRPV1 were performed with  
491 transiently transfected HEK-293T cells. The cDNAs of hTASK-3, hTASK-1, hTHIK-1,  
492 hTRESK and hTASK-3/hTASK-1 were subcloned into the pCDNA3 vector (Invitrogen).  
493 The cDNAs of hTREK-1, mTREK-2, hTRAAK, hTRPM8 and hTRPV1 were subcloned  
494 into the pEGFPN1 expression vector (Invitrogen). For hTASK-3/hTASK-1, concatemer  
495 products were designed for the 3' and 5' ends of TASK-3 and TASK-1, ensuring that the  
496 stop codon of TASK-3 was removed.

497 Electrophysiological tests of hERG, Kv2.1 and BK were performed with stable cell  
498 lines. The CHO-hERG stable cell line was generated in-house and was based on a  
499 standard CHO-K1 cell line. The HEK293-human Kv2.1 stable cell line and the  
500 CHO-human BK stable cell line were generated by Ion Channel Explore (Beijing, China).

501 Whole-cell recordings of ion channels were performed with patch-clamp amplifiers  
502 (EPC10, HEKA or Axon 700B, Molecular Devices) at 23-25 °C. The current signals were  
503 filtered at 2 kHz and digitized at 10 kHz. The pipettes for whole-cell recordings were

504 pulled from borosilicate glass capillaries (World Precision Instruments) and had a  
505 resistance of 3-7 M $\Omega$ . For recordings of K<sup>+</sup> channels, the standard pipette solution  
506 contained (in mM) 140 KCl, 2 MgCl<sub>2</sub>, 10 EGTA, 1 CaCl<sub>2</sub>, and 10 HEPES (pH 7.3,  
507 adjusted with KOH), and the external solution contained (in mM) 150 NaCl, 5 KCl, 0.5  
508 CaCl<sub>2</sub>, 1.2 MgCl<sub>2</sub>, and 10 HEPES (pH 7.3, adjusted with NaOH). For recordings of the  
509 TRPV1 and TRPM8 currents, the internal solution contained (in mM) 140 CsCl, 0.1  
510 CaCl<sub>2</sub>, 1 MgCl<sub>2</sub>, 10 HEPES, and 5 EGTA (pH 7.2, adjusted with CsOH), and the external  
511 solution contained (in mM) 140 NaCl, 5 KCl, 1 MgCl<sub>2</sub>, 0.5 EGTA, and 10 HEPES (pH  
512 7.4, adjusted with NaOH). For recordings of hERG, the outward current of hERG  
513 channels was elicited by a 2.5-second depolarization step to +30 mV from a holding  
514 potential of -80 mV, followed by a 4-second repolarization step to -50 mV to measure the  
515 tail current. For recordings of Kv2.1, currents were evoked by a 200-millisecond  
516 depolarization step to +60 mV from a holding potential of -80 mV. For recordings of BK,  
517 currents were evoked by a 1-second depolarization step to +70 mV from a holding  
518 potential of -80 mV. For recordings of TRPV1 and TRPM8, currents were recorded using  
519 a ramp protocol from -100 mV to +100 mV over a period of 400 milliseconds at a  
520 holding potential of 0 mV.

521 Single-channel current recording was acquired in the excised inside-out configuration  
522 of patch clamp using EPC10 (HEKA) at 23-25 °C. The pipettes had resistances of 7-15  
523 M $\Omega$ . The standard pipette and bath solutions contained (in mM) 140 KCl, 1 CaCl<sub>2</sub>, 2  
524 MgCl<sub>2</sub>, 10 HEPES and 10 EGTA (pH 7.4, adjusted with KOH). At acquisition the  
525 single-channel currents were low-pass filtered at 2 kHz and sampled at 10 kHz.

526 Recordings lasting at least 50 s were put to further analysis to ensure enough events  
527 detected. A threshold at half the open channel current amplitude of the major conductance  
528 state was set to detect the single channel events. No junction potential correction was  
529 done. All the events in the selected section were detected automatically using Clampfit 10  
530 (Molecular Devices, Inc.) followed by manual inspection. The amplitude histograms were  
531 fitted with Gaussian distributions with a bin width of 0.1 pA. TASK3 channel activity in  
532 an inside-out patch was expressed quantitatively as  $NP_O$  (N is the number of channels in  
533 the patch, and  $P_O$  is the probability of a channel being open). The  $NP_O$  was calculated by  
534 the relative area under all points amplitude histogram and expressed as follows:

$$535 NP_O = (A_1 + 2A_2 + 3A_3 + \dots + nA_n) / (A_0 + A_1 + A_2 + \dots + A_n),$$

536 where  $A_0$  is the area under the Gaussian curve of an all points histogram corresponding to  
537 the closed state,  $A_1 \dots A_n$  represents the histogram area that indicates the level of the  
538 distinct open state for 1 to n channels in the patch examined, and n is the number of  
539 active channels. The single channel conductance of TASK3 channels was calculated  
540 using the ratio of current amplitude of the first open state to voltage at -60 mV or +60  
541 mV.

#### 542 **Ethics statement**

543 All experiments with animals were approved by the Animal Research Committee of East  
544 China Normal University (PROTOCOL No. m20171020 and m20180112) and the  
545 Animal Research Committee of West China Hospital of Sichuan University  
546 (PROTOCOL No. 2018175A). For tissue collection, mice were given a lethal dose of  
547 pentobarbital intraperitoneally.

#### 548 **Animals**

549 BALB/c mice and Sprague-Dawley rats were used in most animal studies, and TASK-3

550 KO mice and WT control littermates were on a C57BL/6 background. Male mice or rats  
551 aged 8-10 weeks were used for behavioral tests unless stated otherwise. Animals were  
552 housed in a conventional facility at 21 °C on a 12 h light-dark cycle with unrestricted  
553 access to food and water.

#### 554 **TASK-3 KO mice generation**

555 To generate a *Kcnk9* knockout C57BL/6 mouse line with the CRISPR-Cas9 genome  
556 editing system, two single-guide RNAs (sgRNA-1,  
557 5'-CCGCTTCATGGCCGCGAAGAAGG-3', and sgRNA-2,  
558 5'-AGGAACCGGCGAATTTCCACTGG-3') flanking exon1 were designed (Bioray  
559 Laboratories). A 241-bp deletion was bound to exon 1 of the *Kcnk9* gene locus, resulting  
560 in *Kcnk9*<sup>Δ/Δ</sup> mice with a frameshift mutation. Additional information will be provided  
561 upon request.

#### 562 **Spared nerve injury model**

563 Unilateral spared nerve injury (SNI) surgery was performed. The experimental animals  
564 were placed in the prone position. After disinfection with povidone iodide and 75%  
565 ethanol, a minimal skin incision was made at the mid-thigh level to expose the sciatic  
566 nerve and its three branches by separating the muscle layers. The tibial and common  
567 peroneal nerves were tightly ligated with 5.0 silk threads, and a 1-2 mm section was  
568 removed between the proximal and distal parts of the nerves. The sural nerve was  
569 restrictively preserved to avoid any harmful injury. The muscle layer and skin were

570 closed after surgery, and the animals were transferred to a warm pad to recover from  
571 anesthesia.

### 572 **Chronic inflammatory pain model**

573 A volume of 20  $\mu$ L Complete Freund's Adjuvant (CFA) (Sigma-Aldrich) was  
574 subcutaneously injected into the left hindpaw of the mice to induce chronic inflammatory  
575 pain in mice. After injection, the syringe was maintained for at least 30 s to avoid  
576 overflow.

### 577 **Tail immersion**

578 Mice were restrained in the test tube with their tails stretching out and moving freely 15  
579 min twice daily for 3 days. The distal third of the tail was immersed in a water bath at  
580 5 °C, 20 °C, 40 °C, 46 °C, or 52 °C. Three measurements of tail flick latency (in seconds)  
581 to stimulation, as indicated by rapid tail flexion, were averaged. A cutoff value of 15  
582 seconds was adopted to prevent unexpected damage.

### 583 **Formalin test**

584 Mice were housed individually in Plexiglas chambers. After habituation to the testing  
585 environment for at least 30 min, the left hindpaw of the mice was injected subcutaneously  
586 with formalin (20  $\mu$ L of 2.5% formalin, diluted in saline), and the mice were placed into  
587 the chamber of the automated formalin apparatus, where movement of the  
588 formalin-injected paw was recorded by an action camera (SONY, HDR-AS50). The  
589 number of paw flinches was counted at 5 min intervals for 60 min by a blind

590 experimenter. The time spent exhibiting these pain behaviors was recorded for the first  
591 (0-10 min) and second phases (10-60 min).

### 592 **Paw pressure**

593 The effects of mechanical nociception were evaluated with an Analgesimeter (model  
594 37215; Ugo-Basile, Varese, Italy). Mice were placed in the testing room for 3 continuous  
595 days to acclimate to the environment. The hindpaws of mice were pressed with a constant  
596 pressure of 450 g using a cone-shaped paw-presser with a rounded tip and immediately  
597 released as soon as the animal showed a struggle response, and the reaction latency was  
598 recorded in seconds. The analgesic effects of TASK-3 agonists were evaluated 30 min  
599 after i.p. injection.

### 600 **Spontaneous pain test**

601 After 3 days of acclimation, the SNI mice were placed in an elevated transparent cage (20  
602 × 20 × 14 cm) with a wire mesh floor (0.5 × 0.5 cm). A 5 min duration was videoed by an  
603 action camera (SONY, HDR-AS50) for each mouse, and the number of left hindpaw  
604 flinches was calculated by a blind experimenter.

### 605 **Cold plantar test**

606 Mice were allowed to acclimate to the testing environment 2-3 h daily for 3 continuous  
607 days. The cold probe produced freshly with fine dry ice powder in a 5 mL syringe was  
608 held against a 6 mm depth of flat glass. The center of the hindpaw was targeted, and the  
609 withdrawal latency, manifesting as a quick flick or paw licking, was recorded. A cutoff

610 time of 30 s was used to prevent potential tissue damage.

611 **von Frey test**

612 The SNI rats and mice were individually placed in the chamber as described in the  
613 spontaneous pain test. Mechanical sensitivity was assessed by two methods.

614 Method 1 (for all the von Frey tests described except Fig. 5D): The mechanical paw  
615 withdrawal threshold was assessed using von Frey filaments with an ascending order. The  
616 tip of the filament was perpendicularly targeted to the region comprising the sural nerve  
617 territory, and sufficient stimulation was maintained for 1 s. Rapid paw withdrawal or  
618 flinching was considered a positive response, and the bending force for which at least 60%  
619 of the application elicited a positive response was recorded as the mechanical paw  
620 withdrawal threshold.

621 Method 2 (up-down method): Mechanical responses were tested by stimulating the  
622 region comprising the sural nerve territory with von Frey monofilaments by using the  
623 up-and-down method, starting with 0.04 g. Biting, licking, and withdrawal during or  
624 immediately following the 3 s stimulus were considered a positive response.

625 **Hargreaves test**

626 Hindpaw sensitivity to a noxious thermal stimulus was assessed using a radiant heat  
627 source (model 37370; Ugo-Basile, Varese, Italy). The stimulus intensity was set to  
628 produce an approximate latency of 10 s at baseline, and a cut-off value was set at 20 s to  
629 avoid unexpected damage. Mice were allowed to acclimate in Plexiglas chambers with a

630 glass floor for 3 days, and the time to paw withdrawal was measured per mouse with a 5  
631 min inter-stimulation period. Three trials were averaged to yield the withdrawal latency.

### 632 **RNAscope *in situ* hybridization**

633 The sequences of the target probes, preamplifier, amplifier and label probes are  
634 proprietary and commercially available (Advanced Cell Diagnostics). *In situ*  
635 hybridization was performed on frozen DRG sections (10  $\mu$ m) using RNAscope  
636 Multiplex Fluorescent Reagent Kit v2 (ACDbio, Cat#323100) and RNAscope 4-Plex  
637 Ancillary Kit for Multiplex Fluorescent Kit v2 (ACDbio, Cat#323120). The hybridization  
638 assay was performed as described by the vendor's protocol. The *in situ* probes included  
639 *Kcnk3* (Cat#534881), *Kcnk9* (Cat#475681), *Trpa1* (Cat#400211), *Trpv1* (Cat#313331),  
640 *Trpm8* (Cat#420451), *Rbfox3* (Cat#313311), *Th* (Cat#317621), *Ntrk2* (Cat#423611), and  
641 *P2rx3* (Cat#521611). The specificity of the fluorescence signals was validated by an  
642 RNAscope 3-plex Positive Control Probe (Cat#320881) and an RNAscope 3-plex  
643 Negative Control Probe (Cat#320871). Fluorescence images were taken using a NIKON  
644 AIR<sup>+</sup>MP two-photon confocal scanning microscope and were analyzed using ImageJ  
645 software.

### 646 **Acutely dissociated DRG neuron preparation and electrophysiology**

647 Three to six-week-old male Sprague-Dawley rats were sacrificed. The DRGs were  
648 collected in a 35-mm tissue culture dish and digested in 3% collagenase for 20 min,  
649 followed by 1% trypsin for another 30 min. After titrating by sucking up and down, the



650 DRG neurons were cultured in neurobasal medium containing 2% B27 medium for 2-4 h.  
651 The bath solution contained (in mM) 140 NaCl, 3 KCl, 1.3 MgCl<sub>2</sub>, 10 HEPES, 2.4 CaCl<sub>2</sub>,  
652 and 10 glucose, pH 7.3. The pipette solution contained (in mM) 40 KCl, 10 HEPES, 5  
653 EGTA, 10 NaCl, 95 K-gluconate, and 4 Mg-ATP, pH 7.4. To minimize voltage-gated  
654 currents, voltage ramps from -120 mV to -30 mV were applied, and 1 mM CsCl was  
655 added extracellularly to block hyperpolarization-activated currents. To determine the  
656 reversal potential of the CHET3-sensitive currents, NaCl was replaced with equimolar  
657 KCl. Whole-cell recordings were performed with hardware settings similar to those  
658 described for electrophysiology in HEK-293T cells.

#### 659 **Acutely dissociated DRG neuron preparation and intracellular Ca<sup>2+</sup> imaging**

660 Two-week-old male Sprague-Dawley rats were sacrificed. The DRGs were collected in a  
661 35-mm tissue culture dish and digested in 2.5 mg/mL papain (Sigma-Aldrich) for 30 min  
662 at 37 °C, followed by 2.5 mg/mL collagenase (Sigma-Aldrich) for another 30 min.  
663 Digested ganglia were gently washed with neurobasal medium and mechanically  
664 dissociated by passage through the pipette. Neurons were seeded on laminin-coated wells  
665 (Corning) and cultured overnight at 37 °C in 5% CO<sub>2</sub> in neurobasal medium  
666 supplemented with 2% B27 (Sigma-Aldrich) and containing 50 ng/mL GDNF  
667 (PeproTech) and 50 ng/mL BDNF (PeproTech).

668 Changes in intracellular Ca<sup>2+</sup> concentration were monitored using ratiometric  
669 Fura-2-based fluorimetry. Neurons were loaded with 2 μM Fura-2-acetoxymethyl ester

670 (Yeasen) dissolved in bath solution and 0.02% Pluronic F127 (Sigma-Aldrich) for 30 min  
671 at 37°C. Fluorescence was measured during alternating illumination at 340 and 380 nm  
672 using an Olympus IX73 inverted fluorescence microscopy system. The bath solution  
673 contained (in mM) 138 NaCl, 5.4 KCl, 2 CaCl<sub>2</sub>, 2 MgCl<sub>2</sub>, 10 glucose, and 10 HEPES, pH  
674 7.4, adjusted with NaOH. At the end of each experiment, cells were subjected to a  
675 depolarizing solution containing 50 mM KCl, and cells nonresponsive to 50 mM KCl  
676 were excluded from the analysis. The bar graphs in Fig. 7I and fig. S15B are pooled data  
677 from both responding cells and nonresponding cells under different conditions.

#### 678 **Thermal stimulation**

679 Coverslip pieces with cultured cells were placed in a recording chamber and continuously  
680 perfused (approximately 1 mL/min).

681 Cool stimulation: The temperature was adjusted with iced perfusion solution and  
682 controlled by a feedback device. Cold sensitivity was investigated with an ~2 min  
683 duration ramp-like temperature drop from 37 °C to ~15 °C.

684 Heat stimulation: The temperature was adjusted with a water-heated device (model  
685 TC-324B/344B, America), with the temperature of the perfusion solution raised and  
686 controlled by a feedback device. Heat sensitivity was investigated with an ~5 min  
687 duration ramp-like temperature rise from 25 °C to ~43 °C.

#### 688 **Statistical analysis**

689 Statistical analyses were carried out using Origin 9.0 software (Origin Lab Corporation,

690 Northampton, USA). Data were analyzed as described in the figure legends. The  
691 normality of the data distribution was determined before appropriate statistical methods  
692 were chosen. The drug was assessed as significantly active by using statistical tests to  
693 compare the values at baseline to those at given time points unless specified. No  
694 statistical methods were used to predetermine sample sizes.

695

## 696 **SUPPLEMENTARY MATERIALS**

697 Materials and Methods

698 Fig. S1. A potential druggable pocket identified in several structures of K2P channels.

699 Fig. S2. Selectivity of PK-THPP against hERG, Kv2.1 and BK channels.

700 Fig. S3. Representative current traces for whole-cell recordings on several K2P channels  
701 and other ion channels.

702 Fig. S4. 10  $\mu$ M CHET3 does not show effect on three pain-related GPCRs.

703 Fig. S5. Binding modes of CHET3 suggested by docking and MD simulations.

704 Fig. S6. Whole-cell patch-clamp current recording for three TASK-3 mutants.

705 Fig. S7. Conformations of the extracellular ion pathway in MD simulations.

706 Fig. S8. Dose-dependent analgesia by CHET3 in mechanical allodynia.

707 Fig. S9. Effects of CHET3 on the locomotion activities, blood pressure and body  
708 temperature in rodents.

709 Fig. S10. Comparison of the binding of CHET3, CHET3-1 and CHET3-2.

- 710 Fig. S11. Blockade of CHET3-1 analgesia by PK-THPP.
- 711 Fig. S12. Generation and characterization of TASK-3 gene (*Kcnk9*) knockout mice.
- 712 Fig. S13. Down-regulation of peripheral TASK-3 under chronic pain.
- 713 Fig. S14. Effects of CHET3 and PK-THPP on nociceptive neurons.
- 714 Fig. S15. Thermal stimulation induced  $\text{Ca}^{2+}$  signals were mediated by TRP channels.
- 715 Table S1. Echocardiographic evaluation of CHET3 on mice.
- 716 Table S2. CHET3 pharmacokinetics in plasma and brain following a single  
717 intraperitoneal administration to naïve male C57BL/6 mice.
- 718 Table S3. CHET3 pharmacokinetics in plasma and brain following a single  
719 intraperitoneal administration to SNI 7-d male C57BL/6 mice.

720

## 721 REFERENCES AND NOTES

- 722 1. N. D. Volkow, A. T. McLellan, Opioid abuse in chronic pain—misconceptions and  
723 mitigation strategies. *Eur. J. Neurosci.* **374**, 1253-1263 (2016).
- 724 2. A. S. Yekkiralala, D. P. Roberson, B. P. Bean, C. J. Woolf, Breaking barriers to novel  
725 analgesic drug development. *Nat. Rev. Drug Discov.* **16**, 544-563 (2017).
- 726 3. S. A. N. Goldstein, D. Bockenhauer, I. O'Kelly, N. Zilberberg, Potassium leak  
727 channels and the KCNK family of two-P-domain subunits. *Nat. Rev. Neurosci.* **2**,  
728 175-184 (2001).
- 729 4. J. Busserolles, C. Tsantoulas, A. Eschalier, J. A. Lopez Garcia, Potassium channels in

- 730 neuropathic pain: advances, challenges, and emerging ideas. *Pain* **157**, S7-S14  
731 (2016).
- 732 5. S. G. Waxman, G. W. Zamponi, Regulating excitability of peripheral afferents:  
733 emerging ion channel targets. *Nat. Neurosci.* **17**, 153-163 (2014).
- 734 6. A. Mathie, E. L. Veale, Two-pore domain potassium channels: potential therapeutic  
735 targets for the treatment of pain. *Pflugers Arch.* **467**, 931-943 (2015).
- 736 7. Y. Kim, H. Bang, D. Kim, TASK-3, a new member of the tandem pore K<sup>+</sup> channel  
737 family. *J. Biol. Chem.* **275**, 9340-9347 (2000).
- 738 8. S. Rajan, E. Wischmeyer, G. X. Liu, R. P. Muller, J. Daut, A. Karschin, C. Derst,  
739 TASK-3, a novel tandem pore domain acid-sensitive K<sup>+</sup> channel - An extracellular  
740 histidine as pH sensor. *J. Biol. Chem.* **275**, 16650-16657 (2000).
- 741 9. T. K. Baumann, P. Chaudhary, M. E. Martenson, Background potassium channel  
742 block and TRPV1 activation contribute to proton depolarization of sensory neurons  
743 from humans with neuropathic pain. *Eur. J. Neurosci.* **19**, 1343-1351 (2004).
- 744 10. C. Morenilla-Palao, E. Luis, C. Fernández-Peña, E. Quintero, J. L. Weaver, D. A.  
745 Bayliss, F. Viana, Ion channel profile of TRPM8 cold receptors reveals a role of  
746 TASK-3 potassium channels in thermosensation. *Cell Rep.* **8**, 1571-1582 (2014).
- 747 11. D. J. Langford, C. West, C. Elboim, B. A. Cooper, G. Abrams, S. M. Paul, B. L.  
748 Schmidt, J. D. Levine, J. D. Merriman, A. Dhruva, J. Neuhaus, H. Leutwyler, C.  
749 Baggott, C. W. Sullivan, B. E. Aouizerat, C. Miaskowski, Variations in potassium

- 750 channel genes are associated with breast pain in women prior to breast cancer surgery.  
751 *J. Neurogenet.* **28**, 122-135 (2014).
- 752 12. V. Le Guilloux, P. Schmidtke, P. Tuffery, Fpocket: an open source platform for ligand  
753 pocket detection. *BMC bioinformatics* **10**, 168 (2009).
- 754 13. A. N. Miller, S. B. Long, Crystal structure of the human two-pore domain potassium  
755 channel K2P1. *Science* **335**, 432-436 (2012).
- 756 14. M. Lolicato, P. M. Riegelhaupt, C. Arrigoni, K. A. Clark, D. L. Minor, Jr.,  
757 Transmembrane helix straightening and buckling underlies activation of  
758 mechanosensitive and thermosensitive K2P channels. *Neuron* **84**, 1198-1212 (2014).
- 759 15. Y. Y. Dong, A. C. Pike, A. Mackenzie, C. McClenaghan, P. Aryal, L. Dong, A.  
760 Quigley, M. Grieben, S. Goubin, S. Mukhopadhyay, G. F. Ruda, M. V. Clausen, L.  
761 Cao, P. E. Brennan, N. A. Burgess-Brown, M. S. Sansom, S. J. Tucker, E. P.  
762 Carpenter, K2P channel gating mechanisms revealed by structures of TREK-2 and a  
763 complex with Prozac. *Science* **347**, 1256-1259 (2015).
- 764 16. F. Sievers, A. Wilm, D. Dineen, T. J. Gibson, K. Karplus, W. Li, R. Lopez, H.  
765 McWilliam, M. Remmert, J. Soding, J. D. Thompson, D. G. Higgins, Fast, scalable  
766 generation of high-quality protein multiple sequence alignments using Clustal  
767 Omega. *Mol. Syst. Biol.* **7**, 539 (2011).
- 768 17. S. F. Altschul, T. L. Madden, A. A. Schäffer, J. Zhang, Z. Zhang, W. Miller, D. J.  
769 Lipman, Gapped BLAST and PSI-BLAST: a new generation of protein database

- 770 search programs. *Nucleic Acids Res.* **25**, 3389-3402 (1997).
- 771 18. M. Bertoni, F. Kiefer, M. Biasini, L. Bordoli, T. Schwede, Modeling protein  
772 quaternary structure of homo- and hetero-oligomers beyond binary interactions by  
773 homology. *Sci Rep.* **7**, 10480 (2017).
- 774 19. A. Waterhouse, M. Bertoni, S. Bienert, G. Studer, G. Tauriello, R. Gumienny, F. T.  
775 Heer, T. A. P. de Beer, C. Rempfer, L. Bordoli, R. Lepore, T. Schwede,  
776 SWISS-MODEL: homology modelling of protein structures and complexes. *Nucleic*  
777 *Acids Res.* **46**, W296-W303 (2018).
- 778 20. A. Šali, T. L. Blundell, Comparative protein modelling by satisfaction of spatial  
779 restraints. *J. Mol. Biol.* **234**, 779-815 (1993).
- 780 21. C. A. Coburn, Y. F. Luo, M. X. Cui, J. B. Wang, R. Soll, J. C. Dong, B. Hu, M. A.  
781 Lyon, V. P. Santarelli, R. L. Kraus, Y. Gregan, Y. Wang, S. V. Fox, J. Binns, S. M.  
782 Doran, D. R. Reiss, P. L. Tannenbaum, A. L. Gotter, P. T. Meinke, J. J. Renger,  
783 Discovery of a pharmacologically active antagonist of the two-pore-domain  
784 potassium channel K<sub>2P</sub>9.1 (TASK-3). *ChemMedChem* **7**, 123-133 (2012).
- 785 22. G. Czirják, P. Enyedi, Formation of functional heterodimers between the TASK-1  
786 and TASK-3 two-pore domain potassium channel subunits. *J. Biol. Chem.* **277**,  
787 5426-5432 (2002).
- 788 23. C. E. Clarke, E. L. Veale, P. J. Green, H. J. Meadows, A. Mathie, Selective block of  
789 the human 2-P domain potassium channel, TASK-3, and the native leak potassium

- 790 current,  $IK_{SO}$ , by zinc. *J. Physiol.* **560**, 51-62 (2004).
- 791 24. S. Rinné, A. K. Kiper, G. Schlichthörl, S. Dittmann, M. F. Netter, S. H. Limberg, N.  
792 Silbernagel, M. Zuzarte, R. Moosdorf, H. Wulf, E. Schulze-Bahr, C. Rolfes, N. Decher,  
793 TASK-1 and TASK-3 may form heterodimers in human atrial cardiomyocytes. *J. Mol.*  
794 *Cell. Cardiol.* **81**, 71-80 (2015).
- 795 25. M. Schewe, H. Sun, Ü. Mert, A. Mackenzie, A. C. W. Pike, F. Schulz, C. Constantin,  
796 K. S. Vowinkel, L. J. Conrad, A. K. Kiper, W. Gonzalez, M. Musinszki, M. Tegtmeyer,  
797 D. C. Pryde, H. Belabed, M. Nazare, B. L. de Groot, N. Decher, B. Fakler, E. P.  
798 Carpenter, S. J. Tucker, T. Baukrowitz, A pharmacological master key mechanism  
799 that unlocks the selectivity filter gate in  $K^+$  channels. *Science* **363**, 875-880 (2019).
- 800 26. I. W. Davis, D. Baker, RosettaLigand docking with full ligand and receptor flexibility.  
801 *J. Mol. Biol.* **385**, 381-392 (2009).
- 802 27. G. Lemmon, J. Meiler, Rosetta Ligand docking with flexible XML protocols.  
803 *Methods Mol. Biol.* **819**, 143-155 (2012).
- 804 28. W. González, L. Zúñiga, L. P. Cid, B. Arévalo, M. I. Niemeyer, F. V. Sepúlveda, An  
805 extracellular ion pathway plays a central role in the cooperative gating of a  $K2P K^+$   
806 channel by extracellular pH. *J. Biol. Chem.* **288**, 5984-5991 (2013).
- 807 29. F. V. Abbott, K. B. Franklin, R. F. Westbrook, The formalin test: scoring properties of  
808 the first and second phases of the pain response in rats. *Pain* **60**, 91-102 (1995).
- 809 30. A. Tappe-Theodor, R. Kuner, Studying ongoing and spontaneous pain in



- 810 rodents-challenges and opportunities. *Eur. J. Neurosci.* **39**, 1881-1890 (2014).
- 811 31. E. Navratilova, F. Porreca, Reward and motivation in pain and pain relief. *Nat. Rev.*  
812 *Neurosci.* **17**, 1304-1312 (2014).
- 813 32. L. A. McWilliams, B. J. Cox, M. W. Enns, Mood and anxiety disorders associated  
814 with chronic pain: an examination in a nationally representative sample. *Pain* **106**,  
815 127-133 (2003).
- 816 33. P. J. Turner, K. J. Buckler, Oxygen and mitochondrial inhibitors modulate both  
817 monomeric and heteromeric TASK-1 and TASK-3 channels in mouse carotid body  
818 type-1 cells. *J. Physiol.* **591**, 5977-5998 (2013).
- 819 34. J. Vriens, B. Nilius, T. Voets, Peripheral thermosensation in mammals. *Nat. Rev.*  
820 *Neurosci.* **15**, 573-589 (2014).
- 821 35. L. Li, M. Rutlin, V. E. Abraira, C. Cassidy, L. Kus, S. Gong, M. P. Jankowski, W.  
822 Luo, N. Heintz, H. R. Koerber, C. J. Woodbury, D. D. Ginty, The functional  
823 organization of cutaneous low-threshold mechanosensory neurons. *Cell* **147**,  
824 1615-1627 (2011).
- 825 36. L. Vulchanova, M. S. Riedl, S. J. Shuster, L. S. Stone, K. M. Hargreaves, G. Buell, A.  
826 Surprenant, R. A. North, R. Elde, P2X3 is expressed by DRG neurons that terminate  
827 in inner lamina II. *Eur. J. Neurosci.* **10**, 3470-3478 (1998).
- 828 37. S. L. Pollema-Mays, M. V. Centeno, C. J. Ashford, A. V. Apkarian, M. Martina,  
829 Expression of background potassium channels in rat DRG is cell-specific and

- 830 down-regulated in a neuropathic pain model. *Mol. Cell. Neurosci.* **57**, 1-9 (2013).
- 831 38. H. J. Behrendt, T. Germann, C. Gillen, H. Hatt, R. Jostock, Characterization of the  
832 mouse cold-menthol receptor TRPM8 and vanilloid receptor type-1 VR1 using a  
833 fluorometric imaging plate reader (FLIPR) assay. *Br. J. Pharmacol.* **141**, 737-745  
834 (2004).
- 835 39. M. J. Caterina, M. A. Schumacher, M. Tominaga, T. A. Rosen, J. D. Levine, D. Julius,  
836 The capsaicin receptor: a heat-activated ion channel in the pain pathway. *Nature* **389**,  
837 816-824 (1997).
- 838 40. N. R. Gavva, R. Tamir, Y. S. Qu, L. Klionsky, T. J. Zhang, D. Immke, J. Wang, D.  
839 Zhu, T. W. Vanderah, F. Porreca, E. M. Doherty, M. H. Norman, K. D. Wild, A. W.  
840 Bannon, J. C. Louis, J. J. S. Treanor, AMG 9810  
841 [(*E*)-3-(4-*t*-butylphenyl)-*N*-(2,3-dihydrobenzo[*b*][1,4]dioxin-6-yl)acrylamide], a  
842 novel vanilloid receptor 1 (TRPV1) antagonist with antihyperalgesic properties. *J.*  
843 *Pharmacol. Exp. Ther.* **313**, 474-484 (2005).
- 844 41. C. R. McNamara, J. Mandel-Brehm, D. M. Bautista, J. Siemens, K. L. Deranian, M.  
845 Zhao, N. J. Hayward, J. A. Chong, D. Julius, M. M. Moran, C. M. Fanger, TRPA1  
846 mediates formalin-induced pain. *Proc. Natl. Acad. Sci. U.S.A.* **104**, 13525-13530  
847 (2007).
- 848 42. J. R. Deuis, Z. Dekan, J. S. Wingerd, J. J. Smith, N. R. Munasinghe, R. F. Bhola, W.  
849 L. Imlach, V. Herzig, D. A. Armstrong, K. J. Rosengren, F. Bosmans, S. G. Waxman,

- 850 S. D. Dib-Hajj, P. Escoubas, M. S. Minett, M. J. Christie, G. F. King, P. F. Alewood,  
851 R. J. Lewis, J. N. Wood, I. Vetter, Pharmacological characterisation of the highly  
852 Nav1.7 selective spider venom peptide Pn3a. *Sci Rep.* **7**, 40883 (2017).
- 853 43. E. C. Emery, A. P. Luiz, J. N. Wood, Nav1.7 and other voltage-gated sodium channels  
854 as drug targets for pain relief. *Expert Opin. Ther. Targets* **20**, 975-983 (2016).
- 855 44. P. Royal, A. Andres-Bilbe, P. Á. Prado, C. Verkest, B. Wdziekonski, S. Schaub, A.  
856 Baron, F. Lesage, X. Gasull, J. Levitz, G. Sandoz, Migraine-associated TRESK  
857 mutations increase neuronal excitability through alternative translation initiation and  
858 inhibition of TREK. *Neuron* **101**, 232-245 (2019).
- 859 45. D. W. Kang, J. H. Han, E. M. Talley, D. A. Bayliss, D. H. Kim, Functional expression  
860 of TASK-1/TASK-3 heteromers in cerebellar granule cells. *J. Physiol.* **554**, 64-77  
861 (2004).
- 862 46. A. P. Berg, E. M. Talley, J. P. Manger, D. A. Bayliss, Motoneurons express  
863 heteromeric TWIK-related acid-sensitive K<sup>+</sup> (TASK) channels containing TASK-1  
864 (KCNK3) and TASK-3 (KCNK9) subunits. *J. Neurosci.* **24**, 6693-6702 (2004).
- 865 47. D. Kim, E. J. Cavanaugh, I. Kim, J. L. Carroll, Heteromeric TASK-1/TASK-3 is the  
866 major oxygen-sensitive background K<sup>+</sup> channel in rat carotid body glomus cells. *J.*  
867 *Physiol.* **587**, 2963-2975 (2009).
- 868 48. S. Pronk, S. Páll, R. Schulz, P. Larsson, P. Bjelkmar, R. Apostolov, M. R. Shirts, J. C.  
869 Smith, P. M. Kasson, D. van der Spoel, B. Hess, E. Lindahl, GROMACS 4.5: a

870 high-throughput and highly parallel open source molecular simulation toolkit.

871 *Bioinformatics* **29**, 845-854 (2013).

872 49. J. B. Klauda, R. M. Venable, J. A. Freites, J. W. O'Connor, D. J. Tobias, C.

873 Mondragon-Ramirez, I. Vorobyov, A. D. MacKerell, Jr., R. W. Pastor, Update of the

874 CHARMM all-atom additive force field for lipids: validation on six lipid types. *J.*

875 *Phys. Chem. B* **114**, 7830-7843 (2010).

876 50. P. V. Bharatam, D. S. Patel, P. Iqbal, Pharmacophoric features of biguanide

877 derivatives: an electronic and structural analysis. *J. Med. Chem.* **48**, 7615-7622

878 (2005).

879 51. K. M. Tye, R. Prakash, S. Y. Kim, L. E. Fenno, L. Grosenick, H. Zarabi, K. R.

880 Thompson, V. Gradinaru, C. Ramakrishnan, K. Deisseroth, Amygdala circuitry

881 mediating reversible and bidirectional control of anxiety. *Nature* **471**, 358-362

882 (2011).

883

884 **Acknowledgements:** We thank Bioray Laboratories for technical support in preparing

885 *Kcnk9* knockout mice. We thank Dr. Tao Li (West China Hospital) for technical assistance

886 with blood pressure test and Miss Rongrong Cui (SIMM) for assistance on PK test. We

887 thank the supports of ECNU Multifunctional Platform for Innovation (001 and 011).

888 **Funding:** This work was funded by National Science & Technology Major Project “Key

889 New Drug Creation and Manufacturing Program” of China (2018ZX09711002 to H.J.,

890 Q.Z., and H.Y.), the National Natural Science Foundation of China (21422208 to H.Y.;  
891 31600832 to R.J.), Thousand Talents Plan in Sichuan Province (to R.J.), 1.3.5 Project for  
892 Disciplines of Excellence (ZY2016101), West China Hospital, Sichuan University (to  
893 J.L.), the "XingFuZhiHua" funding of ECNU (44300-19311-542500/006), the  
894 Fundamental Research Funds for the Central Universities (to H.Y., and 2018SCUH0086  
895 to R.J.) and the Special Program for Applied Research on Super Computation of the  
896 NSFC-Guangdong Joint Fund (the second phase) under Grant No.U1501501, and the  
897 State Key Laboratory of Bioorganic and Natural Products Chemistry. **Author**  
898 **contributions:** P.L. performed behavior tests, ISH, Ca<sup>2+</sup> imaging; Y.Q. performed drug  
899 design and computations; Y.M. performed mouse genetics on TASK-3 KO mice and  
900 behavior tests; J.F. performed electrophysiology; Z.S. performed electrophysiology,  
901 behavior tests, ISH; L.H. performed electrophysiology; S.B., Y.W. and B.S. performed  
902 Ca<sup>2+</sup> imaging; J.Z. and W.G.L. performed elevated plus maze tests; Z.C. and N.P. assisted  
903 with behavior tests and cell culture; E.S. performed dark/light box tests; L.Y. assisted  
904 with behavior tests; F.T., X.L. and Z.G. performed electrophysiology for some of the  
905 initial compound screenings; P.S., Y.C. and Y.M. performed pharmacokinetics study; D.H.  
906 performed the qPCR experiments for TASK-3 KO mice; L.Z. performed experiments of  
907  $\mu$ OR; D.Y. performed experiments of 5-HT<sub>1B</sub>R; W.L. performed experiments of CB<sub>1</sub>R;  
908 T.Y., J.X. and Y.M. performed experiments of echocardiography. Q.Z. prepared the  
909 derivatives of CHET3. J.L. oversaw the animal behavior tests. H.J. oversaw the

910 computations. R.J. and H.Y. initiated, supervised the project, analyzed the experiments,  
911 and wrote the manuscript with input from all co-authors. **Competing interests:** The  
912 authors declare no competing interests. **Data and materials availability:** All data is  
913 available in the main text or the supplementary materials.

914

915

916

917

918

919

920

921

922

923

924

925

926

927

928

929

930 **Figures**

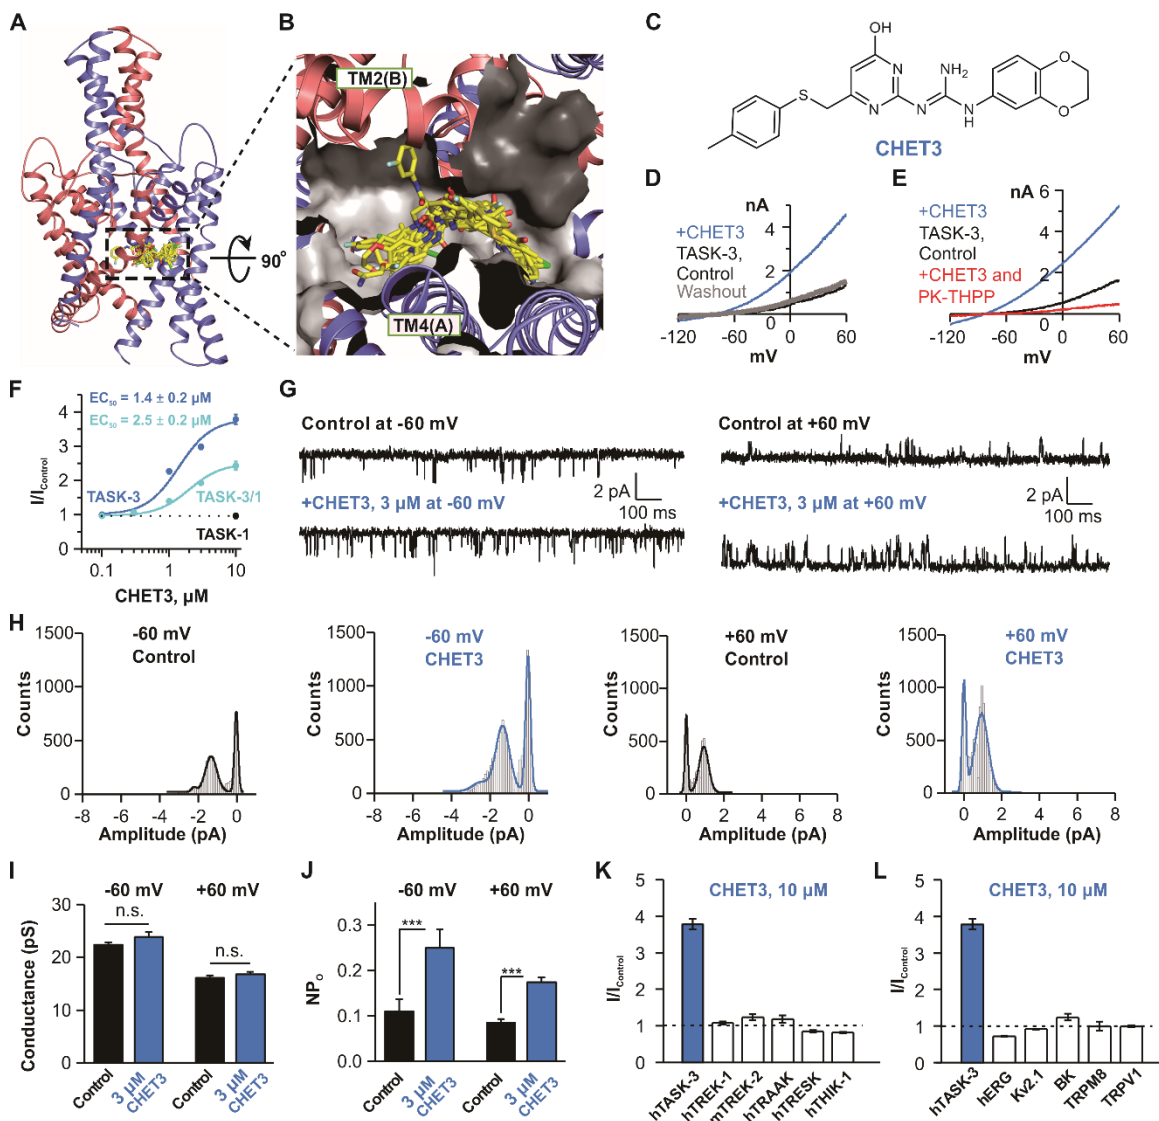

931

932 **Fig. 1. Structure-based ligand discovery of CHET3.**

933 (A) Pocket in a TASK-3 homology model used for virtual screening. Representative

934 docking poses were shown. (B) Cytoplasmic expanded view of the pocket and the

935 docking poses. (C) Chemical structure of CHET3. (D and E) Exemplar whole-cell

936 path-clamp recordings showing the activation of TASK-3 by 10 μM CHET3 and

937 blockade of 0.5 μM PK-THPP. (F) CHET3 dose-response curves for TASK-3 (n = 7) and

938 TASK-3/TASK-1 (n = 5). **(G)** Representative single-channel current traces from  
939 inside-out patches showing the activation of TASK-3 by CHET3 at -60 mV and +60 mV.  
940 **(H)** Histograms of the single-channel currents which were fitted by Gaussian  
941 distributions. **(I and J)** Analysis of conductance changes and NP<sub>o</sub> (channel number times  
942 open probability) changes from the single-channel currents (n = 9; paired *t* test). **(K)**  
943 Summary for the effects of CHET3 on several other K2P channels (n = 7-10). **(L)**  
944 Summary for the effects of CHET3 on hERG, Kv2.1, BK, TRPM8 and TRPV1 channels  
945 (n = 5-7). Data in (F, I to L) are shown as mean ± SEM. \**P* < 0.05, \*\**P* < 0.01, \*\*\**P* <  
946 0.001.

947

948

949

950

951

952



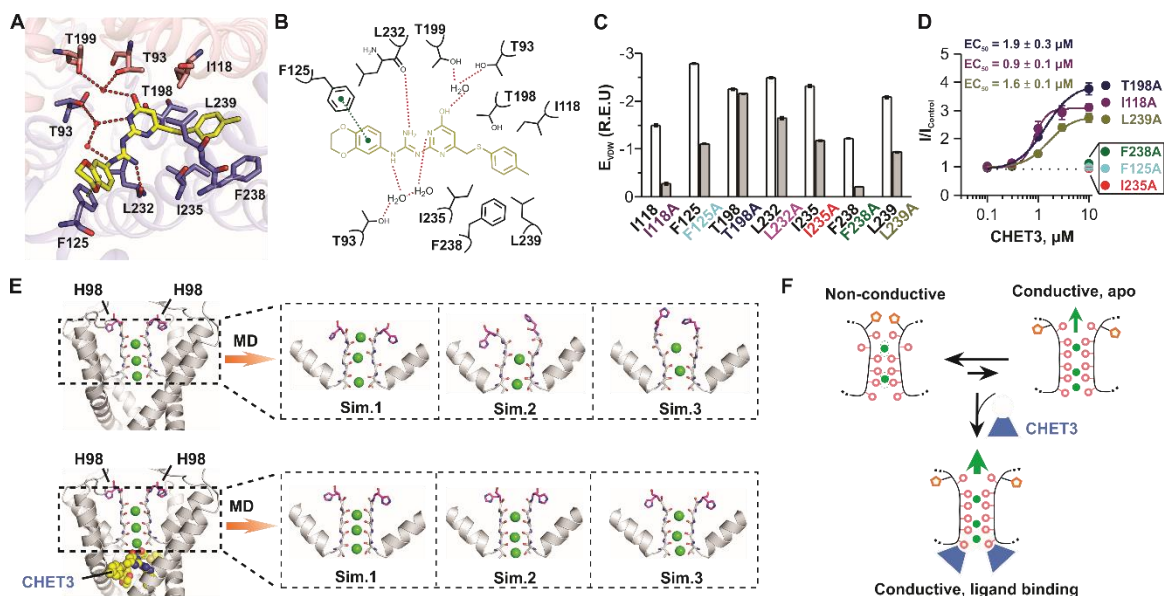

953

954 **Fig. 2. Activation mechanism of CHET3 on TASK-3.**

955 (A and B) 3-dimensional and 2-dimensional diagrams showing interactions between  
 956 CHET3 and TASK-3. Hydrogen bond (red dash) and  $\pi$ - $\pi$  interaction (green dash) were  
 957 shown. (C) Computations showing the contributions of seven residues and their  
 958 mutations to CHET3 binding. Energy unit is Rosetta Energy Unit (R.E.U.). (D)  
 959 Dose-response curves of six mutations on CHET3 activity (n = 6). Data are shown as  
 960 mean  $\pm$  SEM. (E) Selectivity filter conformations of the *apo* TASK-3 and the  
 961 CHET3-bound TASK-3 revealed by MD simulations, including bound potassium ions  
 962 (green spheres), carbonyl oxygen (red sphere) rotation of filter residues, and movements  
 963 of residue H98 (purple sticks). (F) Schematic representation of the action mechanism of  
 964 CHET3 on TASK-3.

965

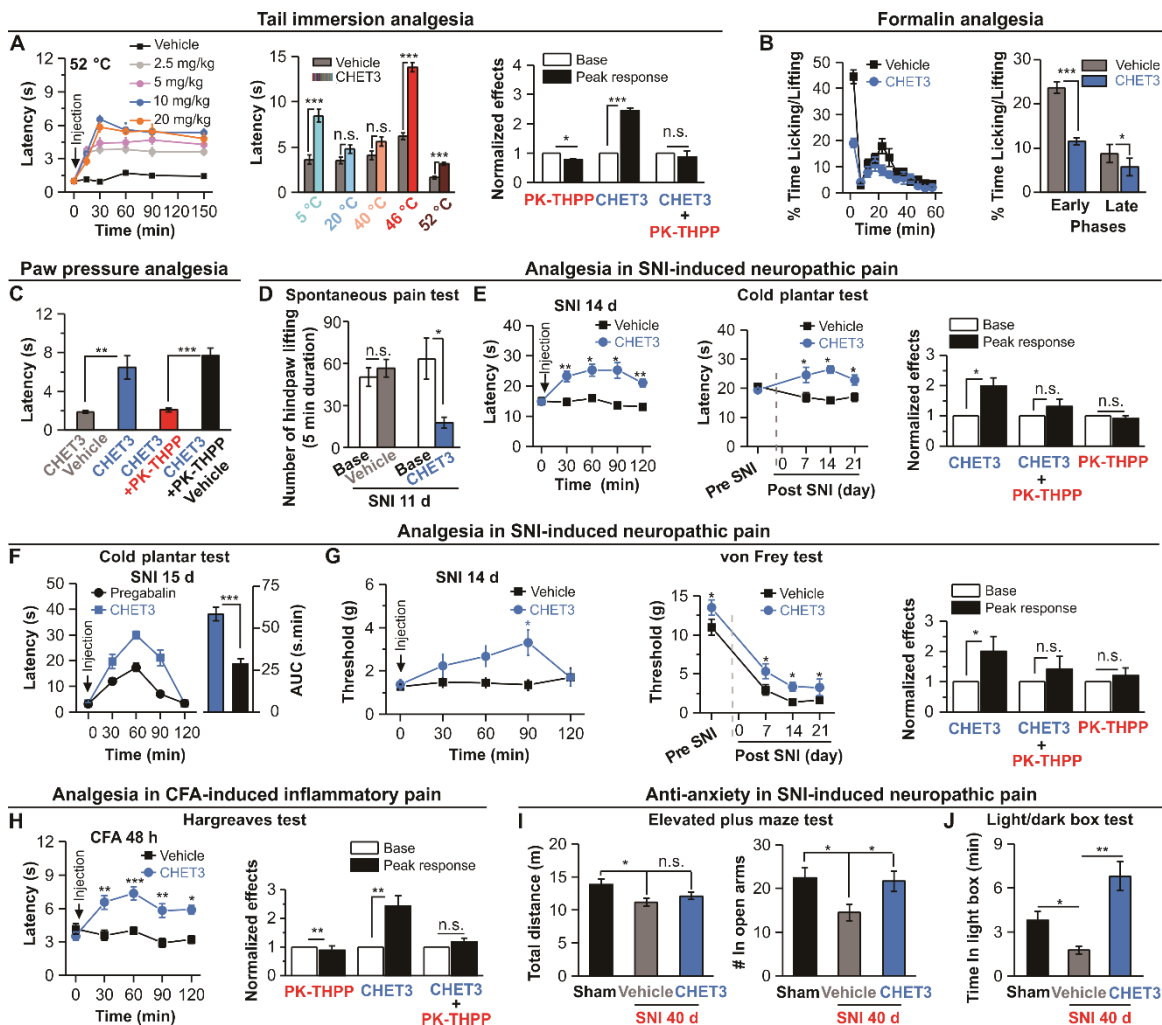

966

967 **Fig. 3. Analgesic effects of CHET3 in rodents.**

968 (A) *left*, Time profile for dose-dependent analgesia by CHET3 in tail immersion test at  
 969 52 °C (n = 6-10); *middle*, CHET3 analgesia in tail immersion tests at different  
 970 temperatures (n = 9-11; unpaired *t* test); *right*, Summary for PK-TTHP effects (n = 8-10;  
 971 unpaired *t* test). (B) Summary for CHET3 analgesia in formalin (2.5%, 20  $\mu$ l) test (n = 8;  
 972 unpaired *t* test). (C) CHET3 and PK-TTHP on the paw withdrawal latency in paw  
 973 pressure test (measured at 45 min post injection, n = 8-10; paired *t* test). (D) CHET3 on  
 974 spontaneous pain within a 10 min duration in mice (measured at 35 min post injection, n

975 = 6-10; unpaired *t* test). **(E)** *left*, Time profile for CHET3 on cold hyperalgesia in mice (n  
976 = 10-11; paired *t* test); *middle*, Summary for CHET3 on cold hyperalgesia at different  
977 stages in SNI (n = 9-11; unpaired *t* test); *right*, Summary for PK-THPP (n = 10; paired *t*  
978 test). **(F)** Comparison of CHET3 and Pregabalin (30 mg/kg, i.p.) in cold plantar test in  
979 mice (n = 11-12; unpaired *t* test). **(G)** *left*, Time profile for CHET3 in mechanical  
980 allodynia in rats (n = 8-13; paired *t* test); *middle*, Summary for CHET3 on mechanical  
981 allodynia at different stages in SNI rats (n = 8-13; paired *t* test); *right*, Summary for  
982 PK-THPP effects (n = 8; paired *t* test). **(H)** *left*, Time profile for CHET3 on heat  
983 hyperalgesia (n = 10-11; paired *t* test); *right*, Summary for PK-THPP effects (n = 11;  
984 paired *t* test). **(I and J)** CHET3 on anxiety-like behaviors in elevated plus maze test (I) (n  
985 = 8-9; unpaired *t* test) and in light/dark box tested (J) (n = 6-8; unpaired *t* test). CHET3  
986 (10 mg/kg) and PK-THPP (15 mg/kg) were administrated via i.p. injections unless  
987 specified. Data are shown as mean ± SEM. \**P* < 0.05, \*\**P* < 0.01, \*\*\**P* < 0.001. n.s.,  
988 not significant.

989

990

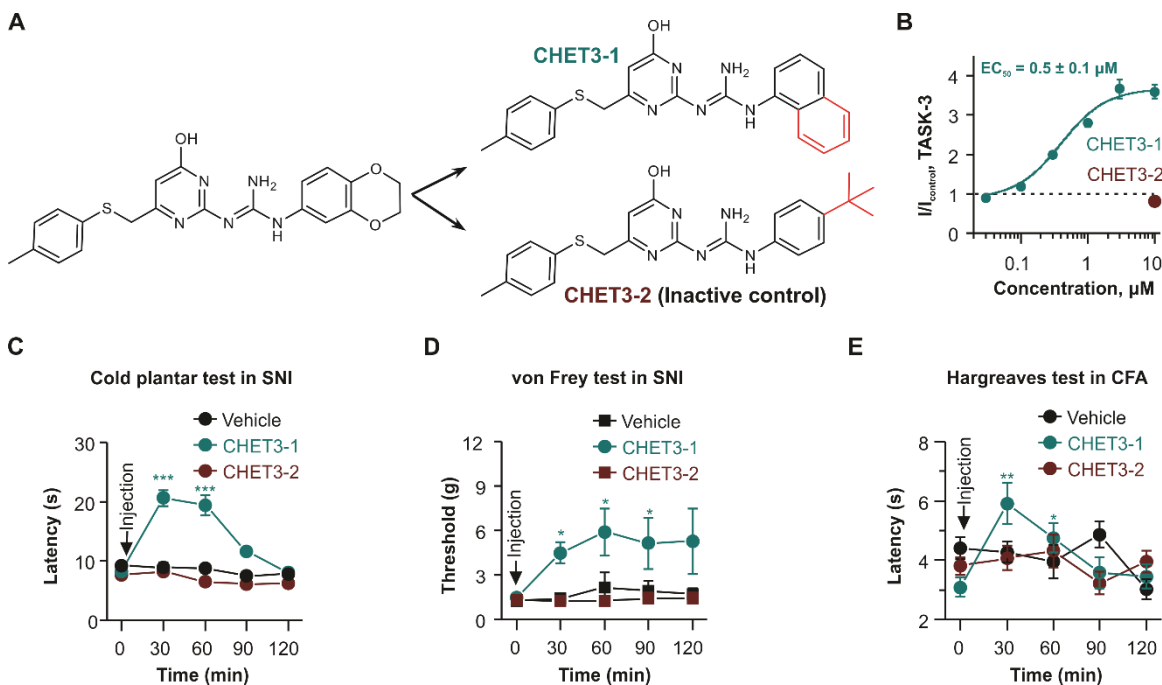

991

992 **Fig. 4. Validation of TASK-3 as analgesic target by using CHET3 derivatives.**

993 (A) Chemical structures of CHET3 derivatives. (B) Dose-response relationships for  
994 CHET3-1 (n = 6) and CHET3-2 (n = 7) on TASK-3. (C to E) CHET3-1 and CHET3-2 in  
995 cold hyperalgesia (C) (n = 9-11; paired *t* test), mechanical allodynia (D) (n = 7-8; paired *t*  
996 test), and heat hyperalgesia (E) (n = 9-10; paired *t* test). Data are shown as mean  $\pm$  SEM.

997 \**P* < 0.05, \*\**P* < 0.01, \*\*\**P* < 0.001.

998

999

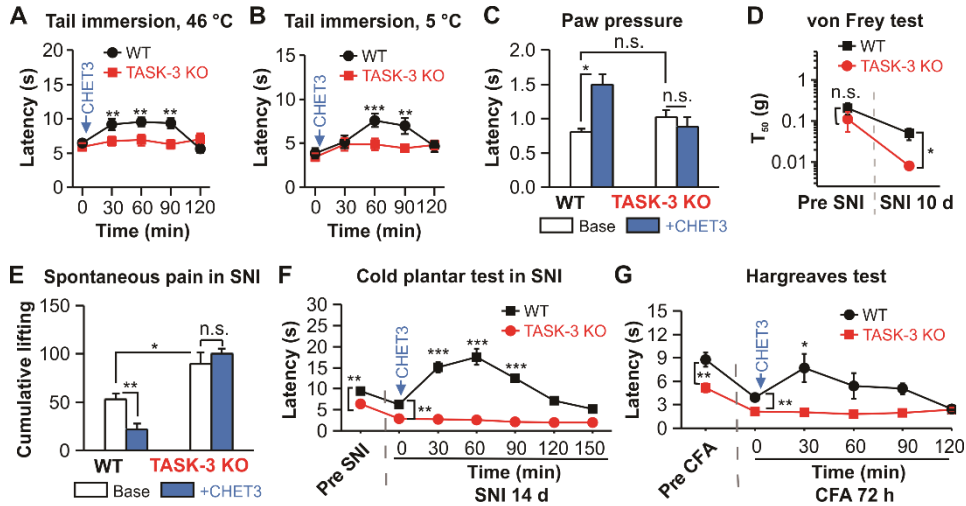

1000

1001 **Fig. 5. Effects of systemic administration of CHET3 on TASK-3 KO mice.**

1002 (A and B) CHET3 had no analgesic effects in tail immersion tests in TASK-3 KO mice (n

1003 = 9-12; paired *t* test). (C) CHET3 had no analgesic effect in paw pressure tests in TASK-3

1004 KO mice (n = 8 for KO, n = 7 for WT; paired *t* test). Note that no change of baseline

1005 sensitivity in nociception for TASK-3 KO mice in A to C. (D) TASK-3 KO mice in SNI

1006 model exhibited enhanced mechanical allodynia (up-down method, n = 8 for KO, n = 10

1007 for WT; unpaired *t* test). (E) TASK-3 KO mice in SNI model exhibited enhanced

1008 spontaneous pain activities which was insensitive to CHET3 (n = 6-7; paired *t* test). (F

1009 and G) CHET3 had no analgesic effect in cold plantar test (n = 6-7; paired *t* test) in SNI

1010 model and Hargreaves test (n = 8-12; paired *t* test) in CFA model in TASK-3 KO mice.

1011 Note that TASK-3 KO mice had shorter paw withdraw latencies in both tests (unpaired *t*

1012 test) in base conditions. Data are shown as mean  $\pm$  SEM. \**P* < 0.05, \*\**P* < 0.01, \*\*\**P* <

1013 0.001. n.s., not significant.

1014

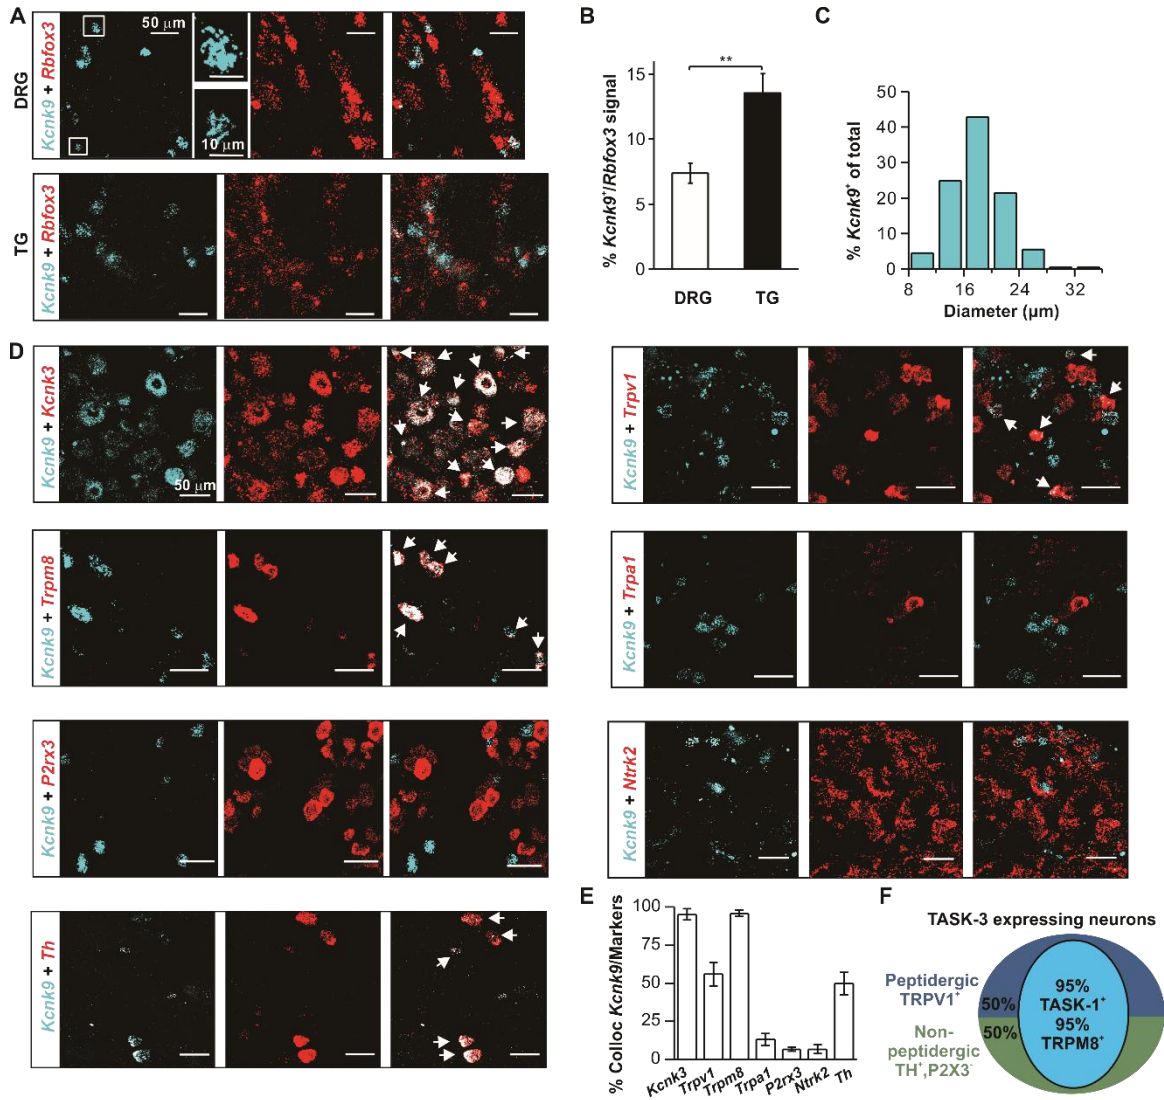

1015

1016 **Fig 6. Distribution of TASK-3 in DRG neurons.**

1017 (A and B) Images and quantifications showing *Kcnk9* expression in sensory neurons

1018 using RNAscope (n = 7 sections from 3 mice) and TG (n = 8 sections from 3 mice)

1019 (Mann-Whitney test). Data in (B) are shown as mean ± SEM. (C) Quantification of the

1020 cell sizes of *Kcnk9*<sup>+</sup> neurons (n = 6 sections from 3 mice). (D) Representative images

1021 showing *Kcnk9*<sup>+</sup> neurons expression in different subtype of DRG neurons using

1022 RNAscope. (E) Bar graph summary for experiments in (D) (n = 4-9 DRG sections from

1023 3-8 mice for each condition). Data are shown as mean  $\pm$  SEM. (F) Schematic summary

1024 for the distribution of *Kcnk9*<sup>+</sup> neurons in DRG. \*\**P* < 0.01.

1025

1026

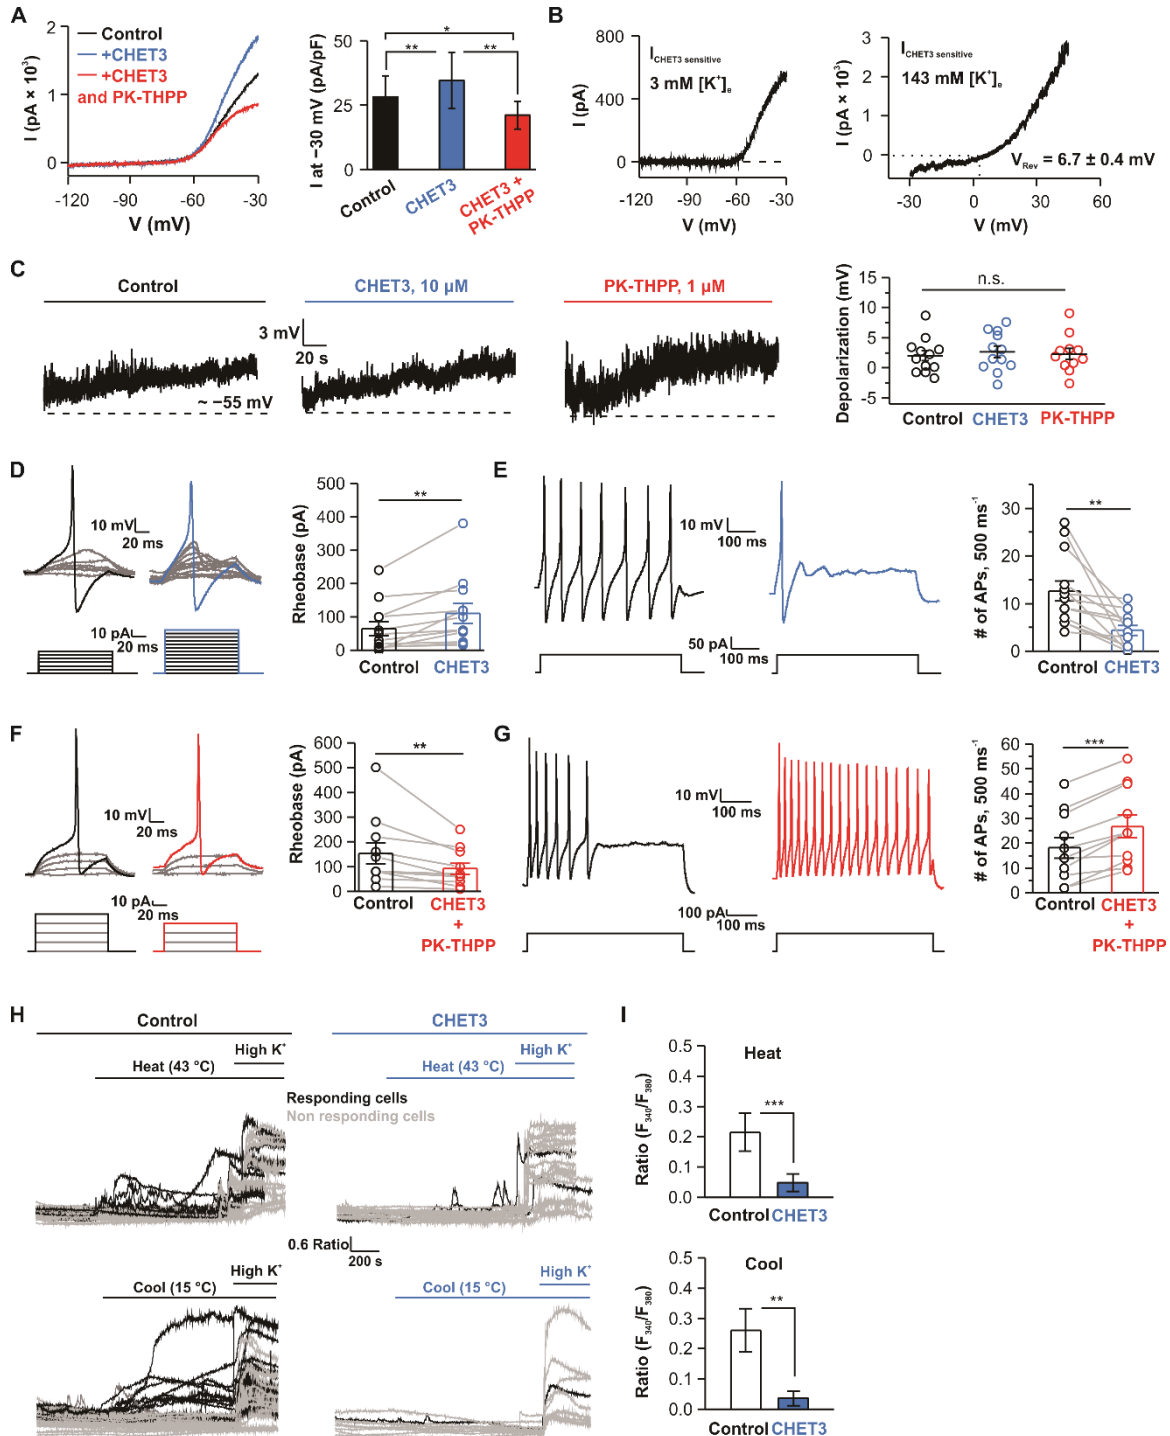

1027

1028 **Fig 7. Functional roles of TASK-3 in nociceptive neurons.**

1029 (A) *left*, Representative electrophysiological traces showing CHET3 (10  $\mu\text{M}$ ) and

1030 PK-THPP (1  $\mu\text{M}$ ) effects on  $K^+$  currents in DRG neurons; *right*, Bar graph summary for



1031 experiments in *left* (n = 9 cells in 6 mice; paired *t* test). **(B)** Representative traces showing  
1032 CHET3-sensitive currents at different extracellular K<sup>+</sup> concentrations (V<sub>Rev</sub> was  
1033 determined from n = 5 cells in 3 mice). **(C)** Representative traces and scatter plots  
1034 showing resting membrane potential (RMP) changes in response to Vehicle, CHET3 or  
1035 PK-THPP (n = 12 cells for Control and CHET3, n = 11 cells for PK-THPP in 5 mice for  
1036 each condition; one-way ANOVA test). **(D and E)** Traces and bar graph showing CHET3  
1037 effect on rheobase and firing frequency in nociceptive neurons (n = 12 cells in 5 mice;  
1038 paired sample Wilcoxon signed rank test in (D), paired *t* test in (E)). **(F and G)** Traces and  
1039 bar graph showing co-application of CHET3 and PK-THPP on rheobase and firing  
1040 frequency in nociceptive neurons (n = 11 cells in 3 mice; paired sample Wilcoxon signed  
1041 rank test in (F), paired *t* test in (G)). **(H)** Individual Ca<sup>2+</sup> imaging traces from small-sized  
1042 DRG neurons in representative field of views in response to heat (25 °C-43 °C) , cooling  
1043 (37 °C-15 °C). **(I)** Bar graphs summary for experiments in (H) (Heat: n = 143 cells in 11  
1044 coverslips for control, n = 99 cells in 9 coverslips for CHET3; Mann-Whitney test. Cool:  
1045 n = 87 cells in 9 coverslips for control, n = 46 cells in 9 coverslips for CHET3;  
1046 Mann-Whitney test. Both experiments were from 3 independent preparations from 6  
1047 mice). Data are shown as mean ± SEM. \**P* < 0.05, \*\**P* < 0.01, \*\*\**P* < 0.001. n.s., not  
1048 significant.  
1049
